# Supplementary material
Source: publisher figshare collection journal article supplement (https://gsapubs.figshare.com/ndownloader/files/28570902)
Supplement: Supplementary file 1 [file 28570902]

## Sheet: DR Table1
Data Repository Table 1
LA-ICP-MS U-Th-Pb isotope compositions for euhedral (RX7302-7303) and non-euhedral (RX6763-6765, RX6755) uraninite, Olympic Dam
		206Pb/204Pb	207Pb/204Pb	208Pb/204Pb	238U/206Pb	1se	207Pb/206Pb	1se	208Pb/232Th	Concordance	206Pb/238U age	1se	207Pb/206Pb age	1se	Cu, ppm
															blue>5 wt%
RX6763-13		32831.3	1802.08	41.5124	16.587	0.396101	0.0554129	0.000423242	0.00535675	0.879826	377.377	9.01184	428.922	8.5137	0.380723
RX6763-13		23647.3	1306	28.82	14.4819	0.362117	0.0557502	0.000281352	0.00431612	0.972894	430.44	10.7631	442.432	5.61209	14.0621
RX6763-13		28589	1592.14	41.4214	14.1307	0.440523	0.0558448	0.000380173	0.00565173	0.987848	440.781	13.7413	446.203	7.56546	0.408326
RX6763-13		22036.8	1211.3	32.1436	18.8362	0.558883	0.0558651	0.000431965	0.00468946	0.745978	333.46	9.89399	447.011	8.5918	0.293795
RX6763-13		832991	45726.6	1112.57	16.0054	0.39001	0.0559775	0.000566649	0.00582419	0.865343	390.683	9.51993	451.478	11.2393	15.5162
RX6763-13		19865.9	1095.59	30.9465	19.7384	0.427936	0.0559943	0.000362789	0.0030075	0.70462	318.588	6.90711	452.142	7.19284	0.118797
RX6763-13		32177.1	1784.77	47.6408	16.6581	0.397177	0.0560982	0.00042089	0.00455802	0.823691	375.814	8.96051	456.256	8.32339	7.26867
RX6763-13		82913.1	4626.37	96.1557	15.2568	0.263474	0.0561631	0.000372767	0.00476933	0.891971	409.256	7.06753	458.821	7.35994	18.8568
RX6763-13		20456.1	1137.39	31.9517	13.9603	0.374194	0.0562403	0.000396425	0.00679115	0.965603	445.979	11.9541	461.866	7.81218	12.5824
RX6763-13		27802.1	1557.25	37.5861	14.9055	0.252086	0.056244	0.000607386	0.00569728	0.906025	418.596	7.07942	462.014	11.9684	0.5328
RX6763-13		114832	6397.25	140.416	17.1123	0.439445	0.0563095	0.000386065	0.00336429	0.788037	366.116	9.40188	464.592	7.5951	19.8768
RX6763-13		45187.3	2519.32	58.0723	17.3508	0.388731	0.0565486	0.000356269	0.0043091	0.762111	361.221	8.09287	473.974	6.96798	0.306221
RX6763-13		30819.4	1728.47	40.9497	13.5091	0.216682	0.0566152	0.000399698	0.00566973	0.965968	460.355	7.38397	476.574	7.80468	20.4064
RX6763-13		37308.9	2077.96	48.6776	13.8866	0.467168	0.0567158	0.000516201	0.00509255	0.932913	448.265	15.0804	480.5	10.0549	0.547785
RX6763-13		31828.2	1794.24	37.4392	13.968	0.393808	0.0568036	0.000610831	0.0044829	0.921107	445.74	12.567	483.918	11.8728	0.67981
RX6763-13		48080.7	2726.17	58.0505	14.1027	0.23852	0.0569209	0.000527424	0.00493712	0.904106	441.627	7.46929	488.469	10.2225	0.472571
RX6763-13		19866	1115.87	38.9929	19.4056	0.468961	0.0569521	0.000462845	0.00344478	0.661491	323.917	7.82787	489.677	8.96404	2.02323
RX6763-13		24941.7	1406.05	36.777	15.0507	0.375082	0.057116	0.000413166	0.00479074	0.836036	414.686	10.3345	496.014	7.97024	22.3512
RX6765		25621.6	1431.15	52.2355	13.0194	0.26761	0.0564584	0.000252582	0.0146347	1.01404	477.045	9.80554	470.44	4.95096	23.3587
RX6765-05		23058	1260.12	45.9057	15.1101	0.319394	0.0554695	0.000365957	0.0135132	0.958046	413.104	8.73208	431.195	7.35099	3735.99
RX6765-05		26658.2	1472.41	54.5216	14.0461	0.209065	0.0557074	0.000282539	0.0168063	1.00594	443.345	6.59882	440.727	5.64177	9.97405
RX6765-05		18662.6	1031.07	40.5161	14.5792	0.287134	0.0557591	0.000398501	0.0163331	0.965835	427.662	8.42273	442.79	7.94708	0.938023
RX6765-05		23158.1	1279.33	45.3875	14.4662	0.412282	0.0557802	0.000269003	0.0130771	0.971281	430.891	12.2802	443.632	5.36177	0.151143
RX6765-05		10890.9	603.521	29.5503	14.228	0.49388	0.0558787	0.000445638	0.013475	0.978357	437.865	15.1991	447.551	8.86078	46116.6
RX6765-05		22116.5	1218.7	41.2038	14.0305	0.355237	0.0560311	0.000528819	0.0160781	0.97844	443.822	11.2371	453.602	10.4751	8.70801
RX6765-05		25669.4	1420.53	48.4829	13.9644	0.220673	0.0561689	0.000291795	0.0128001	0.971242	445.851	7.04556	459.053	5.76038	0.132485
RX6765-05		25530.6	1435.82	53.8788	13.2547	0.219172	0.0562388	0.000254116	0.0150516	1.0153	468.876	7.75306	461.808	5.00794	5.15086
RX6765-05		29421	1634.76	57.514	13.3455	0.26082	0.0562528	0.000259843	0.0119593	1.00744	465.799	9.10341	462.36	5.11904	0.161137
RX6765-05		34871.2	1936.44	71.3151	13.8674	0.297579	0.0562634	0.000309939	0.0122444	0.969934	448.863	9.63206	462.777	6.10437	0.12239
RX6765-05		17123.6	956.992	56.2718	13.388	0.687077	0.0562954	0.000287341	0.0175374	1.00072	464.372	23.8317	464.039	5.65485	14298.2
RX6765-05		18062.4	1005.06	36.932	13.7695	0.433591	0.0563408	0.000281004	0.0132458	0.970208	451.947	14.2314	465.824	5.52396	223.585
RX6765-05		21768.6	1211.11	45.6371	13.1358	0.220087	0.056384	0.000392314	0.0204032	1.01165	472.967	7.92443	467.522	7.70393	0.0891138
RX6765-05		19696	1098.63	52.6465	13.5542	0.413642	0.0563991	0.000304455	0.0178002	0.980259	458.875	14.0037	468.116	5.97642	22728.9
RX6765-05		31131.5	1731.75	61.218	13.6751	0.431195	0.0564489	0.00026648	0.0152914	0.967856	454.959	14.3455	470.069	5.2246	668.532
RX6765-05		23816.6	1330.41	46.3875	13.321	0.307126	0.056528	0.0002817	0.0137905	0.986174	466.624	10.7583	473.166	5.51233	15.3102
RX6765-05		27894.6	1563.95	59.0731	13.1588	0.301422	0.0565791	0.000297853	0.0144877	0.993695	472.171	10.8158	475.167	5.82114	0.127188
RX6765-05		18098.7	1013.74	49.1001	13.0431	0.305555	0.0566229	0.000293523	0.0206679	0.998605	476.209	11.156	476.875	5.73039	8.54552
RX6765-05		27996.7	1562.68	57.2193	12.8772	0.224243	0.0567165	0.000272504	0.0146409	1.00332	482.121	8.39568	480.527	5.30792	3365.51
RX6765-05		21629.2	1209.19	57.3769	13.3273	0.393204	0.0567322	0.000252678	0.0185384	0.969395	466.412	13.7609	481.138	4.91987	4.17432
RX6765-05		12667.9	712.608	51.5595	12.9942	0.462659	0.0568366	0.00033363	0.0251259	0.98503	477.936	17.0169	485.199	6.47961	24681.1
RX6765-05		18844.4	1054.69	51.262	12.9814	0.379617	0.0568692	0.000279954	0.017917	0.983401	478.391	13.9897	486.466	5.43284	13.0738
RX6765-05		19167.1	1081.28	50.4994	12.6717	0.309255	0.0569129	0.000350258	0.0189805	1.00306	489.651	11.9501	488.159	6.78998	7.24527
RX6765-05		9588.25	541.415	50.3202	13.4109	0.263024	0.0570762	0.000476082	0.0301766	0.937574	463.608	9.09265	494.477	9.19276	0.0938127
RX6765-05		18952.5	1062.59	47.042	12.7257	0.267022	0.0570928	0.000318326	0.0186733	0.984913	487.649	10.2323	495.119	6.14416	6804.02
RX6765-09		19840.1	1102.17	59.2758	13.485	0.304619	0.0557233	0.000515189	0.00507128	1.04484	461.149	10.4171	441.36	10.2833	5418.11
RX6765-09		18368.3	1012.64	37.3749	13.3219	0.192414	0.0558786	0.000367911	0.0118671	1.04256	466.596	6.73927	447.549	7.31531	4479.98
RX6765-09		21815.3	1207.58	45.9594	13.1709	0.283636	0.0560743	0.000371852	0.0106733	1.03611	471.752	10.1592	455.312	7.35795	12200.6
RX6765-09		17571.7	976.801	31.7864	14.5437	0.386309	0.0560885	0.000403576	0.00755636	0.940333	428.671	11.3863	455.872	7.98292	0.243057
RX6765-09		26218.2	1457.68	56.95	13.7807	0.298998	0.0561773	0.000377632	0.01443	0.983039	451.593	9.79815	459.384	7.45337	0.09067
RX6765-09		16615.6	922.054	49.0405	13.8443	0.303184	0.0563072	0.000375205	0.0113711	0.967889	449.588	9.8458	464.504	7.38184	0.0967628
RX6765-09		22095.3	1237.85	56.4234	13.5379	0.325151	0.056401	0.000294713	0.00659395	0.981252	459.409	11.034	468.187	5.78493	8.02351
RX6765-09		23427.4	1307.32	45.0222	13.8954	0.236437	0.0564266	0.000493398	0.0124904	0.954812	447.991	7.62278	469.192	9.67884	6750.35
RX6765-09		18572.7	1037.15	39.0016	13.4129	0.399155	0.0564314	0.000345863	0.00999007	0.987553	463.539	13.7944	469.381	6.78389	13663.7
RX6765-09		22988.6	1280.8	52.6637	13.3162	0.427327	0.0564835	0.00032228	0.00643828	0.990167	466.787	14.9796	471.423	6.31327	10953.9
RX6765-09		30144.3	1684.06	59.1525	13.3556	0.287992	0.0565142	0.000398563	0.0100849	0.984833	465.459	10.0368	472.627	7.80173	0.105815
RX6765-09		22034.4	1227.65	43.9864	13.5817	0.208184	0.056527	0.000314662	0.0112046	0.967982	457.98	7.02004	473.129	6.15746	592.97
RX6765-09		22798.4	1261.82	44.8647	13.538	0.480009	0.0565349	0.000479522	0.00784621	0.970365	459.408	16.289	473.438	9.38172	866.962
RX6765-09		24482.7	1368.35	54.459	13.2378	0.410254	0.0565773	0.000309701	0.0110539	0.988128	469.455	14.5489	475.095	6.05296	0.128453
RX6765-09		21514.7	1211.19	45.0917	13.0064	0.229058	0.0567657	0.000382271	0.0127618	0.989769	477.506	8.40944	482.442	7.4371	2492.63
RX6765-09		23885.4	1329.41	54.6767	12.9866	0.298592	0.056793	0.000407213	0.00522628	0.989041	478.204	10.995	483.503	7.91708	6131.46
RX6765-09		24072.1	1350.96	50.5053	12.9989	0.219879	0.0568181	0.000342347	0.0126435	0.986151	477.77	8.08156	484.479	6.6519	5031.97
RX6765-09		15403.9	860.268	33.2551	12.8585	0.331094	0.0568718	0.000438855	0.00661121	0.992257	482.797	12.4316	486.565	8.51596	3773.1
RX6765-09		25771	1448.39	56.7172	12.9883	0.290056	0.0568838	0.000339118	0.00743018	0.981755	478.147	10.678	487.033	6.57864	2387.31
RX6765-09		20711.2	1163.57	48.6227	12.9043	0.234997	0.0569052	0.000314461	0.00764688	0.98623	481.143	8.76197	487.861	6.09715	2296.41
RX6765-09		14342.4	804.213	46.1088	12.66	0.300055	0.0569862	0.000327373	0.0104637	0.998141	490.086	11.6156	490.999	6.33507	4751.67
RX6765-09		25053.3	1402.86	57.7436	12.7884	0.239293	0.0570149	0.000287073	0.00952672	0.986253	485.345	9.08164	492.11	5.55136	512.927
RX6765-09		20270.4	1140.78	42.5479	13.0254	0.268065	0.0570931	0.00041511	0.00950358	0.963045	476.833	9.81333	495.131	8.01218	3138.95
RX6765-09		19606	1103.65	75.2854	12.7591	0.215571	0.0571462	0.000290683	0.0157691	0.97836	486.42	8.21832	497.179	5.60338	183.858
RX6755-08		24415.8	1403.3	33.0788	10.0774	0.161157	0.0576883	0.000256214	1.31854e-10	1.17755	609.906	9.75355	517.943	4.87517	1264.57
RX6755-08		70042	4024.05	105.169	10.1523	0.153919	0.0578918	0.000541029	4.65423e-11	1.15208	605.609	9.18162	525.668	10.2449	13976.9
RX6755-08		40090.1	2311.13	63.1941	10.1042	0.144765	0.0579909	0.000318156	5.86226e-11	1.14911	608.362	8.71611	529.42	6.01041	2477.12
RX6755-08		30733	1777.83	50.0586	10.2237	0.14044	0.0581401	0.000328948	1.51622e-11	1.12434	601.571	8.26357	535.044	6.19242	4292.47
RX6755-08		42336	2442.07	54.8008	10.3384	0.127136	0.0580325	0.000301709	9.87422e-11	1.12092	595.198	7.31944	530.99	5.6941	2484.78
RX6755-08		28062	1611.93	44.5532	10.318	0.136073	0.0580628	0.000230735	0.000696358	1.12063	596.324	7.86431	532.134	4.3515	6011.21
RX6755-08		43957.4	2526.02	62.8528	10.3978	0.157357	0.0580242	0.000228193	0.000677577	1.11546	591.947	8.95829	530.677	4.30749	2758.7
RX6755-08		40075.1	2299.33	54.5195	10.6513	0.175342	0.0577194	0.000341244	6.18233e-11	1.11432	578.476	9.52293	519.128	6.48828	1126.57
RX6755-08		28848	1670.87	54.2387	10.232	0.189531	0.0582988	0.000370262	1.20793e-11	1.11108	601.105	11.1344	541.011	6.94413	1677.48
RX6755-08		49932.7	2846.6	66.9355	10.6184	0.144455	0.0578066	0.000375348	7.17021e-11	1.11054	580.19	7.89307	522.438	7.12194	1528.73
RX6755-08		28336.3	1634.34	46.6939	10.3502	0.176119	0.0582009	0.000270708	5.8745e-11	1.10648	594.549	10.1169	537.332	5.08875	2304.45
RX6755-08		41248.3	2389.52	55.2513	10.4254	0.166145	0.0582212	0.000312606	7.66749e-11	1.0973	590.451	9.40978	538.094	5.87354	1293.52
RX6755-08		31706.4	1837.61	44.1295	10.5646	0.165491	0.0580832	0.000347536	5.89084e-11	1.09403	583.015	9.13276	532.903	6.55112	1648.01
RX6755-08		22364.9	1292.45	46.9869	10.5007	0.147279	0.0582987	0.000321201	1.03972e-11	1.08392	586.404	8.22466	541.004	6.02402	2393.38
RX6755-08		36647.7	2104.05	49.8972	10.8454	0.191356	0.0579504	0.000330199	0.000330203	1.07706	568.566	10.0318	527.886	6.24391	1644.21
RX6755-08		38221.1	2203.13	54.8007	10.543	0.149247	0.058351	0.000379338	0.00107773	1.07586	584.156	8.26935	542.968	7.10561	1422.01
RX6755-08		41294.8	2410.91	69.4788	10.6246	0.160504	0.0588095	0.000333541	0.00244314	1.03537	579.863	8.75986	560.052	6.18113	15726.3
RX6755-08		22388.8	1291.85	52.0533	11.5309	0.269434	0.0582778	0.000229168	7.70778e-12	0.992431	536.132	12.5274	540.22	4.30008	7787.67
RX6755-08		28198.6	1619.06	54.141	11.9275	0.419497	0.0580603	0.000239425	8.65649e-12	0.975499	519.002	18.2536	532.038	4.51566	1923.93
RX6755-08		25849.9	1488.69	44.6676	12.0025	0.416575	0.0579937	0.00024661	3.17756e-11	0.974241	515.884	17.905	529.524	4.65849	13023.2
RX6755-21		19178	1115.64	64.4952	10.0439	0.155971	0.0583151	0.000307175	2.79971e-10	1.12966	611.849	9.50137	541.621	5.75875	1151.86
RX6755-21		14706.3	850.776	54.3189	10.2374	0.12049	0.058058	0.000287612	3.18915e-10	1.12943	600.803	7.07115	531.951	5.42479	815.602
RX6755-21		19006.9	1095.39	71.319	10.515	0.176589	0.0577534	0.000322932	2.25212e-10	1.12532	585.642	9.83527	520.421	6.13514	637.966
RX6755-21		18026.3	1038.42	66.4132	10.1809	0.140209	0.0582456	0.000287188	2.3127e-10	1.12055	603.987	8.31796	539.011	5.39286	585.329
RX6755-21		15047.5	869.746	60.1115	10.4896	0.143908	0.0579781	0.000330063	2.18748e-10	1.10977	587	8.05316	528.936	6.23725	544.831
RX6755-21		14427.5	830.456	52.5235	10.5492	0.130025	0.0580422	0.000293838	2.13648e-10	1.09875	583.827	7.19598	531.353	5.54429	805.232
RX6755-21		16618.5	958.41	63.4386	10.4649	0.176272	0.0581857	0.000303967	1.89274e-10	1.09606	588.322	9.90976	536.762	5.71599	658.523
RX6755-21		16075.3	930.435	63.2244	10.3886	0.132724	0.0583011	0.000441742	2.58249e-10	1.09491	592.451	7.56912	541.096	8.28426	365.333
RX6755-21		18537.2	1081.56	69.6753	10.4045	0.14955	0.0583206	0.000343302	4.29746e-10	1.09183	591.584	8.50316	541.827	6.4352	1398.35
RX6755-21		17197.3	999.656	55.648	10.1713	0.117964	0.0586934	0.000316611	2.0352e-10	1.0878	604.534	7.01124	555.743	5.88328	237.593
RX6755-21		19731.7	1143.7	62.3062	10.4385	0.152657	0.0584269	0.000309216	0.00240247	1.0805	589.745	8.6247	545.806	5.7818	99.3717
RX6755-21		14613.6	840.813	58.9891	10.8122	0.155105	0.0581582	0.000316287	2.81175e-10	1.06441	570.233	8.18018	535.728	5.95152	924.197
RX6755-21		20984.2	1217.54	74.9367	10.8419	0.164116	0.0581591	0.000241483	1.55067e-10	1.06155	568.739	8.6091	535.762	4.54385	931.95
RX6755-21		13907.2	809.603	54.0756	10.5355	0.161302	0.0586084	0.000356667	2.04654e-10	1.05786	584.551	8.94962	552.579	6.64078	585.502
RX6755-21		18800.2	1108.98	61.8607	10.2544	0.145924	0.0590215	0.000324594	3.49597e-10	1.05628	599.853	8.53611	567.889	5.98579	394.916
RX6755-21		12454.3	727.727	54.4271	10.5735	0.174747	0.0587424	0.000337454	0.000744839	1.04481	582.546	9.62774	557.563	6.26342	663.276
RX6755-21		14153.1	829.422	55.6362	10.9524	0.158042	0.0582589	0.000317252	2.11824e-10	1.04399	563.245	8.12754	539.511	5.95554	290.444
RX6755-21		19017.3	1093.61	58.3577	11.4483	0.248297	0.0578237	0.000381965	0.00225215	1.03202	539.841	11.7084	523.09	7.24453	575.279
RX6755-21		20344.3	1195.55	73.2251	10.7851	0.129594	0.0588904	0.00035805	2.70425e-10	1.0152	571.606	6.86841	563.046	6.62287	1257.37
RX6755-21		14560.6	851.568	54.7447	10.8411	0.250904	0.0592628	0.000425706	0.00757221	0.986155	568.78	13.1637	576.765	7.80671	1441.41
RX6755-32		21445	1254.76	63.4955	10.9412	0.214603	0.0589667	0.000292998	5.8043e-12	0.996344	563.797	11.0584	565.866	5.40999	15947.3
RX6755-32		18153.8	1049.68	63.3734	11.7056	0.532591	0.0585562	0.000329604	9.31126e-12	0.959705	528.446	24.0436	550.634	6.1444	5753.33
RX6763-13		32480.1	1833.02	56.822	12.8754	0.373016	0.0574013	0.000453057	0.00832845	0.951088	482.187	13.9696	506.984	8.68	0.260245
RX6763-18		61447.1	3513.28	40.3775	10.2932	0.232247	0.0575965	0.000334862	0.00177875	1.16182	597.693	13.4858	514.445	6.38563	9.95427
RX6763-18		82910.5	4765.76	50.9251	10.3779	0.177621	0.0576332	0.000312659	0.00246652	1.14963	593.032	10.1499	515.847	5.957	9.62663
RX6763-18		42356.7	2451.34	30.6088	10.6451	0.185315	0.0579808	0.000343403	0.000370987	1.09405	578.795	10.0759	529.038	6.48891	3.52896
RX6763-18		32333.2	1881.18	46.2092	10.5773	0.174405	0.0581122	0.000306672	0.0014024	1.09054	582.343	9.60202	533.995	5.77688	221.877
RX6763-18		52436.3	3060.45	38.014	10.8061	0.192419	0.0583245	0.000318944	0.000842254	1.05272	570.546	10.1595	541.972	5.97807	0.0675645
RX6763-18		27799.4	1614.42	56.5729	10.7733	0.210492	0.0587293	0.000374789	0.00137302	1.02716	572.206	11.1799	557.076	6.95851	16.9449
RX6763-18		43616.7	2544.66	39.9125	11.2462	0.367177	0.0581907	0.000325971	0.00402884	1.02271	549.14	17.9289	536.947	6.12905	29.0755
RX6763-18		37594.7	2209.83	56.4079	11.0459	0.209697	0.0585284	0.000352879	0.00332035	1.01653	558.68	10.6061	549.597	6.58256	21.7107
RX6763-18		19829.8	1171.34	54.6839	11.8498	0.268562	0.0576923	0.000318301	2.29433e-10	1.00806	522.271	11.8367	518.094	6.05597	56.2655
RX6763-18		22173.2	1286.34	58.7849	10.8354	0.213524	0.0590903	0.000367603	0.00781444	0.99762	569.065	11.2141	570.423	6.76812	1884.33
RX6763-18		34373.4	1992.36	43.7164	11.6993	0.323134	0.0580638	0.000270869	0.00273829	0.993519	528.72	14.6031	532.169	5.10828	33.901
RX6763-18		30124.2	1724.81	48.9464	11.7733	0.30576	0.0580223	0.000228694	1.54752e-10	0.990432	525.528	13.6482	530.605	4.31714	27.3954
RX6763-18		17019	1007.06	47.4775	10.5978	0.156515	0.0597201	0.00042284	0.00958489	0.97948	581.269	8.58459	593.447	7.67322	89.5869
RX6765-05		18203.9	1038.46	35.4952	12.2542	0.328731	0.0573184	0.000511079	0.0122989	1.00375	505.694	13.5658	503.806	9.81112	24.0293
RX6765-05		7837.58	448.846	37.2767	12.0037	0.349279	0.0575926	0.000465035	0.0297344	1.00299	515.838	15.0097	514.297	8.86877	53828.7
RX6765-05		9760.55	553.521	45.9328	12.8664	0.468417	0.0576522	0.000315175	0.020606	0.934066	482.509	17.5663	516.568	6.00222	115200
RX6765-09		24463.4	1409.87	48.9166	11.3995	0.647735	0.0586562	0.000518457	0.00929482	0.977806	542.058	30.8005	554.361	9.64234	0.478423
RX6765-09		12304.4	701.223	66.2742	12.1486	0.554251	0.0578679	0.000405147	0.0160457	0.971717	509.921	23.264	524.763	7.67617	74997.8
RX6765-09		11994	670.431	59.0116	13.6436	0.442908	0.0572764	0.00037367	0.0158812	0.907963	455.972	14.802	502.192	7.18054	78179.8
RX6765-09		2989.99	177.771	43.2467	11.3794	0.51155	0.0603618	0.000488287	0.0576323	0.88064	542.976	24.4089	616.569	8.7328	9189.26
RX7302-04		16933.9	1411.28	83.6678	3.62382	0.169084	0.0975297	0.000711845	1.7249e-12	0.995896	1570.94	73.2983	1577.42	6.82955	4984.97
RX7302-07		57632	4991.83	50.3056	3.60041	0.0862184	0.0976114	0.000488937	7.63622e-12	1.00065	1580	37.836	1578.98	4.68605	2047
RX7302-20		50204.9	4248.47	77.9188	3.60602	0.151833	0.097292	0.000745809	1.98276e-12	1.00316	1577.82	66.4348	1572.85	7.17719	62360.6
RX7302-22		16729.6	1429.77	60.9851	3.52191	0.0960229	0.0978572	0.000472906	4.71819e-12	1.01735	1611.16	43.9274	1583.69	4.51824	1236.59
RX7302-22		20840.6	1819.56	58.0278	3.44332	0.0914723	0.0975252	0.000715784	3.14903e-12	1.04202	1643.61	43.6628	1577.33	6.86775	22201.3
RX7302-26		12642.1	1231.67	57.0824	4.37409	0.16554	0.0983284	0.000554873	5.17797e-12	0.833356	1327.26	50.2309	1592.66	5.2698	117293
RX7302-41		24336.5	2127.65	44.6319	3.63679	0.193581	0.0990501	0.000572681	1.25238e-11	0.974886	1565.97	83.3541	1606.31	5.38972	40.5707
RX7302-41		34666.1	2919.74	49.6603	4.08104	0.141401	0.0978229	0.000522489	7.25487e-12	0.89248	1412.82	48.952	1583.03	4.99415	173.255
RX7302-47		16025.5	1390.13	45.0413	3.76448	0.184741	0.0979484	0.000896902	1.0017e-11	0.957873	1518.64	74.5268	1585.43	8.55927	34133.2
RX7302-47		16178.6	1368.21	47.256	4.13674	0.226724	0.0972207	0.000938343	4.65289e-12	0.888157	1395.72	76.4955	1571.47	9.03825	23348.1
RX7302-52		23579.5	2007.47	38.2415	4.37059	0.108245	0.0996758	0.000633136	2.37634e-10	0.820881	1328.22	32.8955	1618.04	5.91228	913.255
RX7302-52		20102.1	1722.4	39.7964	4.44283	0.111476	0.0991673	0.000583701	1.56017e-11	0.81359	1308.67	32.8362	1608.51	5.48537	4594.23
RX7302-52		21511	1866.16	41.2985	4.41056	0.128208	0.0977106	0.000588625	3.89108e-11	0.833289	1317.33	38.2927	1580.88	5.63435	6139.74
RX7302-56		23277.1	1979.69	45.5215	4.35638	0.175776	0.0984801	0.000484807	2.43555e-11	0.834908	1332.13	53.7504	1595.54	4.59554	611.498
RX7302-60		4974.91	452.806	42.1729	3.8782	0.0792519	0.0977956	0.000509828	1.15135e-11	0.934492	1478.84	30.2205	1582.51	4.87482	118836
RX7302-63		17307.6	1694.59	37.3688	3.57914	0.0928928	0.0986875	0.000452259	4.63307e-11	0.993032	1588.32	41.2232	1599.47	4.27582	8556.1
RX7302-63		37099	3176.93	47.271	3.88939	0.114079	0.098235	0.000436406	1.01307e-11	0.927178	1475.04	43.2642	1590.89	4.14958	174.727
RX7302-63		10735.4	972.826	38.9724	3.64623	0.0641742	0.0982318	0.000686782	2.98133e-11	0.982111	1562.37	27.4979	1590.83	6.53055	280.33
RX7302-63		14387.7	1206.5	43.2383	4.08288	0.107045	0.0981236	0.000471511	1.67273e-11	0.888896	1412.25	37.0263	1588.77	4.4897	397.832
RX7302-71		59965.7	5034.95	81.3789	3.57142	0.114242	0.0989327	0.000614838	2.16984e-12	0.992063	1591.37	50.9044	1604.1	5.795	326.697
RX7302-71		58826.9	4938.46	51.4402	3.65182	0.103861	0.0981743	0.000438436	8.69189e-12	0.98145	1560.24	44.3748	1589.73	4.17209	0.0374396
RX7302-71		16060.4	1353.33	51.4637	3.5696	0.0686657	0.0980764	0.000689552	6.68554e-12	1.00265	1592.08	30.6257	1587.87	6.56981	4240.35
RX7302-71		59780.9	5021.39	52.4992	3.66129	0.0760851	0.097942	0.000473327	9.54333e-12	0.981931	1556.66	32.3489	1585.31	4.51739	0.347016
RX7302-71		12541.3	1104.24	46.8527	3.54731	0.0803265	0.0974688	0.000431462	1.4004e-11	1.01567	1600.94	36.2523	1576.25	4.14274	552.942
RX7302-71		13524.6	1148.37	56.3307	3.78223	0.0714127	0.0974638	0.000691418	4.76705e-12	0.959481	1512.29	28.5537	1576.15	6.63916	610.476
RX7302-71		18063	1558.59	45.217	3.67319	0.108835	0.0971928	0.000576422	1.09942e-11	0.988058	1552.18	45.9904	1570.94	5.55417	1137.47
RX7302-76		30385.8	2535.29	62.9794	3.5914	0.125107	0.0979168	0.000572389	3.62765e-12	0.999173	1583.51	55.1619	1584.83	5.46458	1269.25
RX7302-76		73706.4	7064.95	91.6263	3.58662	0.179622	0.0978423	0.000787202	6.95361e-12	1.00125	1585.38	79.398	1583.4	7.52252	393.59
RX7302-76		52035.5	4350.42	84.961	3.66589	0.100343	0.0973393	0.000414338	2.51515e-12	0.988033	1554.92	42.5614	1573.76	3.98492	12.2902
RX7302-80		5650.97	476.389	40.6633	3.63277	0.0616606	0.097664	0.000440045	4.7467e-11	0.9921	1567.51	26.606	1579.99	4.21463	156.835
RX7302-80		19158.3	1813.02	40.4204	3.52311	0.0763479	0.0973951	0.000390016	3.67922e-11	1.02276	1610.67	34.9043	1574.83	3.74832	482.597
RX7302-84		26178.3	2212.2	47.9357	3.99042	0.110754	0.098909	0.00036587	2.0421e-11	0.898931	1441.57	40.0108	1603.65	3.44944	57.3783
RX7302-84		35389.6	3384.19	58.9608	4.57906	0.185314	0.0978838	0.000426189	9.15556e-12	0.803777	1273.34	51.5318	1584.19	4.07052	200.968
RX7302-84		26077.5	2117.63	54.049	3.7718	0.0980134	0.0971862	0.000398865	6.36829e-12	0.965115	1516.01	39.3949	1570.81	3.84362	0.0391177
RX7303-8		102943	9514.15	335.955	3.70633	0.174051	0.0979484	0.000482186	9.77443e-14	0.971241	1539.83	72.3114	1585.43	4.60157	22018.7
RX7303-15		183028	15518.9	1030.5	4.07612	0.130385	0.0994378	0.000672629	1.16442e-13	0.876526	1414.35	45.2418	1613.59	6.29973	320.444
RX7303-15		20670.8	2011.65	75.4094	4.2606	0.0960925	0.0981475	0.000537885	2.00693e-13	0.855217	1359.13	30.6535	1589.22	5.12016	81315.9
RX7303-18		85017	7559.31	275.674	4.14297	0.19811	0.0991029	0.00060163	1.38602e-13	0.867186	1393.83	66.6506	1607.3	5.65842	965
RX7303-18		23422.6	2290.24	121.364	4.40686	0.143542	0.098507	0.000440305	1.512e-13	0.825995	1318.33	42.9413	1596.05	4.17229	80626.8
RX7303-21		3174.55	321.583	50.228	3.49614	0.11649	0.0976468	0.00501365	1.2113e-12	0.979518	1621.66	54.033	1655.57	6.58975	249382
RX7303-21		55505.5	4817.48	242.028	3.59272	0.204146	0.0985224	0.000565939	1.78603e-13	0.991642	1583	89.9494	1596.34	5.36173	154744
RX7303-26		89069.8	7708.35	434.869	4.38331	0.125501	0.0982825	0.00051805	2.31279e-13	0.832229	1324.73	37.9292	1591.79	4.92294	6499.5
RX7303-28		334076	28497.4	579.305	3.59647	0.079221	0.0997173	0.000569218	1.93116e-13	0.976973	1581.54	34.8372	1618.81	5.31267	0.0460848
RX7303-31		213868	18429.8	1133.55	3.58731	0.106917	0.098748	0.00112021	1.73773e-13	0.990318	1585.11	47.243	1600.61	10.5828	125057
RX7303-33		41184.1	3583.22	285.12	3.47089	0.0837694	0.0977282	0.000517349	2.78099e-13	1.03217	1632.08	39.3901	1581.22	4.95098	13034.4
RX7303-39		21505.7	2080.74	161.256	3.54192	0.0928415	0.0974296	0.000469212	4.94388e-13	1.01752	1603.1	42.0208	1575.49	4.50745	105253
RX7303-42		56926.9	5522.04	193.039	3.61637	0.155244	0.0975956	0.000624734	5.57122e-13	0.996919	1573.82	67.5612	1578.68	5.98876	988.714
RX7303-47		48220.6	4248.47	195.514	3.58351	0.117064	0.0989427	0.000650273	5.14935e-13	0.988979	1586.6	51.83	1604.29	6.12822	9910.99
RX7303-54		45417.7	3823.79	193.549	3.55931	0.180788	0.0981251	0.000601474	4.39654e-13	1.00464	1596.16	81.0738	1588.8	5.7271	54651.6
RX7303-54		26341.3	2321.03	137.775	3.58915	0.0923792	0.0975307	0.000653245	7.18481e-13	1.00441	1584.4	40.78	1577.43	6.26726	53144.4
RX7303-58		59378.1	5314.56	45.4558	3.58074	0.103487	0.0988787	0.000541476	6.22533e-12	0.990402	1587.69	45.8859	1603.08	5.10701	15743.1
RX7303-58		34979.3	3146.72	43.7602	3.60286	0.0996037	0.0975529	0.000413321	5.35048e-12	1.00075	1579.05	43.654	1577.86	3.9643	126.875
RX7303-62		49040	4382.51	697.869	4.02982	0.149054	0.0986631	0.000409175	4.82709e-13	0.893635	1428.93	52.8527	1599.01	3.86967	34597.7
RX7303-62		37415.7	3157.64	504.598	3.97238	0.138202	0.0983815	0.000400847	4.91905e-13	0.908239	1447.43	50.3572	1593.67	3.80441	2283.59
RX7303-67		101722	8621.89	602.971	3.15243	0.177839	0.0996788	0.000619965	5.19799e-13	1.09766	1776.12	100.196	1618.1	5.78908	11938
RX7303-67		55091.7	4871	415.13	3.62277	0.0890165	0.0989743	0.000512782	5.11696e-13	0.979104	1571.35	38.6102	1604.88	4.83057	18263.4
RX7303-70		21230.9	2084.29	100.735	3.5845	0.141376	0.0987956	0.000525872	8.11928e-13	0.990451	1586.22	62.562	1601.51	4.96502	77669.9
RX7303-70		20326.6	1991.77	94.6518	3.53516	0.0732979	0.0987615	0.000575762	3.85871e-13	1.00309	1605.81	33.2949	1600.87	5.43839	43849
RX7303-77		30482.5	2978.07	164.806	3.75799	0.133642	0.0982344	0.000603898	1.33601e-12	0.956061	1520.97	54.0891	1590.88	5.74223	44188.8
RX7303-77		17882.6	1685.17	81.8126	3.64207	0.108249	0.0978461	0.000582281	1.07569e-12	0.987672	1563.95	46.4835	1583.47	5.56403	401785
all results obtained with laser-ablation ICP-MS, using 840 Ma uraninite from Kintyre (Western Australia) as primary standard
Pb isotope ratios (206Pb/204Pb, 207Pb/204Pb, 208Pb/204Pb) have large uncertainties due to small signals at mass 204 compromised by Hg interference; these ratios are listed for illustrative purposes only
Cu concentrations (reflecting Cu sulfide impurities) measured during U-Th-Pb analyses are highly variable (0-401785 ppm, ablations with >5 wt% Cu marked in blue); while they correlate with relatively low 206Pb/204Pb in some cases,
high Cu ablations do not plot outside the range defined by U-Pb compositions of low-Cu ablations
Degree of Concordance in U-Pb results calculated as the ratio of the 206Pb/238U and 207Pb/235U ages (not shown)

## Sheet: DR Table 2
Data Repository Table 2
Major and trace element composition of euhedral (RX7303,7989) and non-euhedral (RX6763-6765, RX6755) uraninite, Olympic Dam
		as ppm, normalized to 100% total
SampleName	FileName		Mg	Al	Si	P	K	Ca	Ti	V	Mn	Fe	Co	Ni	Cu	Zn	Y	Zr	Nb	Mo	Ba	La	Ce	Pr	Nd	Sm	Eu	Gd	Tb	Dy	Ho	Er	Tm	Yb	Lu	Hf	Ta	W	Au	Pb204	Pb206	Pb207	Pb208	Bi209	Th232	U238
			ppm	ppm	ppm	ppm	ppm	ppm	ppm	ppm	ppm	ppm	ppm	ppm	ppm	ppm	ppm	ppm	ppm	ppm	ppm	ppm	ppm	ppm	ppm	ppm	ppm	ppm	ppm	ppm	ppm	ppm	ppm	ppm	ppm	ppm	ppm	ppm	ppm	ppm	ppm	ppm	ppm	ppm	ppm	ppm
Euhedral uraninite, ~1600 Ma
RX7989	MA10a514		20.558	198.183	16335.6	212.61	1.5305	2548.84	68.1842	0.772688	172.518	13331.1	11.9574	0.165017	17488.8	6.17757	12017.7	101.535	293.51	1.09375	9.91529	762.658	10441.5	1587.28	8388.81	2520.15	406.316	2130.58	438.669	2903.33	600.181	1703.99	287.822	1800.02	235.516	1.43396	5.76765	38.6966	0.0696182	518.06	449220	46757.4	1317.22	7.00797	4249.61	283621
RX7989	MA10a515		2.33255	24.9864	385.457	24.4431	20.7428	6153.75	120.355	0.296425	323.279	11512.4	29.809	3.8584	16951	5.86323	12601.3	77.5188	769.529	1.65563	16.1261	1425.87	15360.7	1936.16	9555.96	2382.04	330.284	2165.02	479.117	3217.25	717.506	2114.57	308.722	2250.57	240.709	0.620766	13.7839	85.1737	bdl	5665.26	448543	52027	7042.91	52.569	3512.29	288499
RX7989	MA10a516		1.57117	14.5557	216.211	4.17635	9.47729	5175.29	85.1803	0.232248	245.347	7657.96	35.4093	1.6603	9523.24	4.55953	11575.1	35.549	662.716	0.615606	8.76036	1574.54	14799.2	1836.57	12537.1	2205.83	279.064	1912.65	372.154	2559.8	581.458	1875.14	274.851	1842.22	230.173	0.754964	12.8635	59.9284	bdl	2596.36	465896	48904.5	3242.2	34.6539	2425.85	298360
RX7989	MA10a517		2.53511	31.2592	483.955	5.55789	9.28747	4308.28	160.004	0.409008	346.676	17840.2	35.7822	1.76087	21212.5	8.36871	15757.5	140.805	667.02	1.65362	8.27524	1651.92	15851.7	2073.04	10633	2705.62	369.362	2482.65	503.924	3418.26	696.504	2153.33	320.639	2258.49	257.396	0.5303	14.5602	135.601	0.0328558	2558.45	421461	45730.6	4082.37	48.5327	8353.4	303959
RX7989	MA10a518		1.92651	11.9052	210.393	1.95395	9.10994	5003.23	80.9852	0.0258631	182.724	164.021	0.00478653	0.257716	0.435655	0.615284	11139.8	348.079	626.277	0.543436	8.46087	1386.64	13021	1827.35	8203.42	2082.37	252.16	1973.5	358.297	2512.38	559.916	1696.42	252.048	1931.06	196.048	1.43437	13.2822	35.6954	0.0138719	9882.41	464143	59041.2	12971.5	47.5438	11632.8	292393
RX7989	MA10a520		0.937601	2.51102	bdl	13.5791	8.05739	4150.55	28.3979	0.098643	79.423	375.114	0.942907	bdl	216.904	bdl	11631.3	139.2	436.215	bdl	5.72813	1439.39	15182.8	1795.84	9008.17	2417.05	251.526	1934.32	345.794	2451.47	512.416	1625.92	290.822	1788.17	220.805	1.00483	9.37898	19.2929	0.000421671	1113.53	494208	52799.2	2212.68	9.68796	6145.38	291729
RX7989	MA10a522		1.57639	3.08598	bdl	bdl	2.70234	3557.51	19.4756	0.0236676	101.441	259.171	0.0730166	bdl	57.0732	0.712533	8359.13	69.8747	75.605	0.575964	3.93397	482.207	5887.87	988.323	6430.49	1841.7	166.431	1412.25	292.605	1820.73	370.266	1132.03	149.879	1126.56	104.204	0.73966	0.987236	19.8648	bdl	313.896	451610	48656.2	1368.64	1.66358	7490.81	359633
RX7989	MA10a523		42.5146	9.04652	232.441	83.9407	2.2321	21864.8	38.3932	1.01811	2011.42	524.922	0.116739	bdl	bdl	0.96099	7734.88	74.3903	99.891	0.331444	14.4833	441.946	6129.23	947.529	5528.2	1823.1	188.636	1587.77	270.432	1902.35	361.295	1111.54	167.228	1131.05	109.303	1.00833	0.859611	32.0543	bdl	291.501	404041	43389.5	1209.61	1.57818	6578.06	386329
RX7989	MA10a524		1.63438	15.8061	265.814	13.5297	8.26079	3732.31	76.1231	0.233121	264.283	15103.9	38.2917	1.85432	16926.6	4.33606	9622.71	133.505	273.103	0.473392	3.51391	987.51	10754.8	1607.6	8133.08	2227.7	341.718	1694.56	339.267	2410.73	509.53	1576.39	233.222	1690.59	188.321	1.25244	4.01622	39.0453	0.2571	1739.14	442874	48536.1	3647.81	19.546	10923.6	309880
RX7989	MA10a525		1.15401	5.72719	109.517	bdl	6.3905	3859.57	36.4508	0.038825	83.0688	987.553	0.998395	bdl	802.242	0.464649	9467.18	374.149	68.9941	0.525253	3.09972	675.562	8960.27	1433.24	8114.15	2358.28	229.413	2059.48	322.501	2261.6	518.921	1496.45	220.258	1375.06	155.677	3.55068	1.55679	17.4532	0.0339117	91.4831	461944	50044.5	2090.62	1.45577	10506.8	332740
RX7989	MA10a526		3.35847	1.06416	65.5443	bdl	8.95162	3984.41	9.95253	0.00843724	132.199	189.313	0.00883865	0.0920791	0.840124	0.425857	8634.24	301.198	17.005	0.726188	bdl	636.519	8868.61	1238.05	7000.3	2217.1	203.886	1860.33	322.984	2134	447.536	1403.42	196.427	1450.84	138.323	3.07664	0.603076	10.3183	0.0143117	115.243	434074	47393	1724.35	1.62993	9110.37	368480
RX7989	MA10a527		0.731397	bdl	38.1429	5.7459	3.17462	3070.46	0.741116	0.00793361	14.4935	54.2402	bdl	bdl	bdl	bdl	11159.7	426.474	8.13333	0.47724	0.900306	744.064	11259.3	1501.79	9536.1	2878.31	278.519	2255.16	391.354	2707.02	596.668	1726.91	255.396	1744.49	176.565	4.14164	0.290484	6.62474	bdl	43.625	448656	48681.5	1834.39	0.107407	10792.5	341968
RX7989	MA10a528		1.07922	3.86141	16.5784	9.09185	0.544936	3091.03	21.3314	0.101311	53.3778	3369.49	7.08841	0.164002	3514.73	0.547777	9963.36	270.696	54.4373	0.255165	3.90908	923.408	12002.7	1607.61	9014.69	2610.09	227.946	2010.75	351.4	2557.83	474.122	1368.96	214.101	1551.26	153.036	1.07051	0.969967	11.6624	bdl	225.551	477544	51596.7	2242.14	3.63446	9662.86	306597
RX7989	MA10a529		1.34157	15.0485	2515.62	89.0572	19.3162	2908.15	61.4158	0.804493	127.901	213.576	0.12697	0.277029	172.826	0.0787188	8192.87	127.35	84.1719	0.556135	6.02647	653.801	7203.95	1080.18	6162.78	1809.76	207.977	1598.96	285.886	2064.64	395.334	1275.8	182.905	1127.69	113.501	0.933491	0.934194	27.0887	bdl	1272.95	419907	46989	2676.18	5.66062	7739.84	382625
RX7989	MA10a530		0.825097	7.44262	113.355	7.70013	4.87758	4080.3	51.7028	0.0172759	127.747	214.695	bdl	bdl	bdl	1.5704	10353.9	266.754	105.899	0.584947	1.65267	671.502	8746	1270.84	7629.4	2186.99	235.767	1935.92	330.606	2378.59	467.057	1360.29	193.72	1345.55	131.717	2.67532	1.30023	30.7496	bdl	498.145	456152	49392	2245.83	4.48517	12331.6	338401
RX7989	MA10a531		1.35238	1.34866	67.0478	bdl	5.91401	3162.34	7.63434	0.000470805	27.8786	83.7423	0.0661246	bdl	0.433505	bdl	7842.36	156.982	23.5749	0.40818	0.240133	472.073	6539.9	1045.95	6217.97	1747.18	202.071	1560.53	275.63	1899.65	376.53	1175.3	155.594	1179.9	111.861	1.56591	0.678129	12.1225	bdl	67.5941	456377	49805.6	1533.66	0.150493	7975.57	354098
RX7989	MA10a532		1.06144	3.83774	52.0508	bdl	12.1621	3208.68	22.4017	0.0960276	96.2945	142.097	bdl	0.185865	bdl	1.37835	9628.97	275.979	74.8895	0.615591	4.47529	820.602	10419	1526.8	8657.12	2429.48	239.949	1859.75	367.155	2448.95	479.063	1446.56	203.039	1351.81	135.795	2.431	0.990087	16.5075	0.0287507	452.549	446264	48318.8	2641.27	2.74802	13385.3	345966
RX7989	MA10a533		1.18088	3.38203	125.501	bdl	8.66369	3788.48	11.2099	0.0350024	89.5848	568.781	1.3579	bdl	182.66	bdl	6990.76	101.702	37.1885	0.390798	4.11751	1886.18	9522	1130.37	6039.3	1685.35	174.496	1410.25	222.404	1603.7	321.481	1014.9	145.281	986.528	109.838	0.761022	0.496632	11.796	0.00429706	149.717	431921	47492.8	1317.07	0.312505	7599.66	375679
RX7989	MA10a534		14.8691	13.4388	764.863	183.898	9.47042	9971.72	61.0155	1.50951	566.174	2773.54	0.0552015	bdl	bdl	2.23041	11049.6	34.1116	730.591	0.34068	10.0058	1870.6	17690.9	2252.81	12066.3	2674.9	427.673	2343.99	412.247	2924.99	575.071	1854.91	283.15	1894.75	213.336	0.690923	2.06567	36.6476	bdl	1406.91	451082	53564	2119.38	6.97417	3836.96	313524
RX7989	MA10a535		2.60422	6.52126	330.637	0.258744	12.8816	6494.69	32.0363	0.0841263	230.895	305.698	0.0257423	bdl	0.11583	2.41326	9958.77	20.0177	890.743	0.147178	12.0972	1644.39	14556.2	2014.02	10379	2481.96	351.463	1982.81	375.972	2576.82	520.311	1592.1	273.728	1677.55	196.308	0.213253	2.02955	5.52816	0.0316363	4774.96	451739	52369.1	5600.99	22.526	2554.37	326114
RX7989	MA10a536		1.09404	4.54368	66.6271	11.4815	26.0379	3905.65	16.4777	0.0808097	60.7354	134.671	0.00145498	bdl	0.499257	4.58063	10519.9	27.5744	590.323	0.141406	4.97865	1601.91	14463.9	1880.34	9317.6	2716.85	346.137	1972.5	356.299	2585.67	535.434	1528.86	245.247	1632.08	176.453	0.124284	2.62883	6.07346	0.000778788	5018.48	475946	57575.4	6069.96	22.8158	2868.8	302321
RX7989	MA10a537		1.34613	1.89199	166.883	6.03797	9.93369	3658.54	168.884	0.0717904	47.3159	123.166	bdl	0.0534255	bdl	0.938117	9774.6	25.8217	415.995	0.186969	3.50896	1170.67	12623.4	1745.88	8488.27	2092.9	308.845	1759.43	317.305	2114.78	475.543	1368.81	214.158	1494.5	155.967	0.433646	2.68532	9.03824	bdl	893.106	463745	50070.6	1511.86	4.29613	2304.41	336133
RX7989	MA10a538		1.47807	0.878892	bdl	bdl	9.8671	4311.14	3.11317	0.0190068	24.8002	85.1316	0.0119417	bdl	bdl	1.63968	10524.2	33.6363	292.983	0.128936	0.906964	1597.48	17834.9	1950.72	9564.35	2651.65	358.816	1846.91	412.376	2429.75	519.195	1554.79	274.964	2017.96	187.78	0.0747786	3.93777	3.38521	0.0056723	345.864	473014	51084	1078.58	0.355976	2634.53	316747
RX7989	MA10a539		3.09553	5.25064	365.816	4.51252	10.4759	4305.52	8.61795	0.217477	39.662	3970.36	bdl	bdl	bdl	4.24231	10120.9	45.2494	380.249	0.166215	1.80236	1650.79	16872.4	1910.7	9309.39	2415.03	308.899	1744.79	341.011	2514.28	530.182	1546.76	248.94	1901.73	226.267	0.497932	5.36662	2.38006	bdl	168.256	482010	51800.1	1218.01	0.706504	4562.99	302096
RX7989	MA10a541		4.84661	59.3458	1552.67	282.142	23.932	6948.57	168.587	3.40371	914.45	38454.2	62.4713	5.26904	39711.9	14.2712	12885.1	57.4037	213.431	0.362511	28.8566	1200.22	10909.4	1560.15	8542.94	2714.63	541.065	2409.76	466.978	3277.86	682.246	2073.55	308.176	2198.44	276.805	1.05192	3.06625	49.0592	0.0462444	4835.83	405872	46561.3	5540.05	56.3827	3052.93	279436
RX7989	MA10a543		4.34991	17.6769	523.162	5.72893	35.2864	10349.5	110.09	0.0922633	717.207	1829.5	3.76929	bdl	799.526	4.16465	13750.8	23.7056	234.863	bdl	26.2166	2406.92	17329.5	2355.32	11261.9	3330.84	620.442	2563.87	506.777	3522.01	706.203	2349.44	342.955	2723.2	306.302	0.549987	3.13731	38.374	bdl	5515.09	437434	50870	6471.84	35.1577	1690.13	318274
RX7989	MA10a544		3.96298	9.11712	499.111	bdl	26.2738	7615.6	69.6196	0.00185059	381.604	709.943	0.0773038	bdl	0.250474	1.75588	10993.4	37.5125	195.169	0.201125	17.5524	2823.34	17807.6	2258.47	10830.1	2840.84	480.455	2254.89	433.434	2825.61	619.013	1805.07	288.013	1894.36	268.034	0.661874	4.67638	18.2983	0.0341324	5918.17	430520	51468.5	7428.83	36.7091	2971.28	333933
RX7303-g	14OCB643		37.2828	670.661	2803.13	669.717	406.631	14603.5	145.075	5.41412	90.3368	70092.8	6.43187	0.882826	245799	8.89426	6877	21.4791	743.907	91.9381	251.289	960.447	9521.86	1129.1	6283.05	1448.33	270.03	1142.94	228.934	1744.97	388.588	1183.76	190.997	1480.52	167.723	0.687027	2.3189	151.132	2.18624	712.425	275458	27635.4	931.891	39.7371	1243.51	168086
RX7303-h	14OCB645		3.80372	10.68	94.2917	bdl	28.7008	4640.26	7.65493	0.157444	58.7501	1042.63	1.29535	0.561884	3887.9	4.49986	10685.5	0.986792	474.449	17.5212	25.5598	1604.56	17835.5	2348.68	10109.6	2443.58	309.052	1949.87	407.075	2562.83	545.742	1543.53	246.805	1943.46	245.793	0.517348	1.68651	34.4579	0.0237885	352.66	415155	44578.7	1461.21	2.84215	4309.86	368295
Non-euhedral uraninite
RX6763-5	14OCB236		19.004	285.53	2025.3	288.556	48.9493	18907.3	28.1319	3.77631	2202.98	2564.76	0.0247714	bdl	2.141	1.01047	5726.73	13.96	83.3719	110.324	575.79	349.06	2597.51	630.243	4052.6	1775.61	568.877	1754.67	218.913	1142.36	202.692	554.168	72.4664	429.896	61.4328	0.33582	0.253964	162.585	0.0044668	121.1	212383	12519.1	133.435	2.20424	3.47836	611235
RX6763-5	14OCB237		22.3271	316.031	3817.62	324.706	63.1156	18060.5	26.7353	5.66663	2239.29	9263.22	0.235853	0.0788981	1.34143	0.656377	5921.51	14.8472	87.8163	117.811	605.293	362.506	2643.15	637.414	4056.07	1825.91	598.538	1754.63	220.099	1155.58	208.16	586.549	74.9227	446.192	63.2456	0.817371	0.402931	170.615	0.103926	128.356	207268	11973.2	134.55	2.457	3.40184	605139
RX6763-5	14OCB238		12.8505	193.037	2426.23	200.029	26.1611	17711.8	23.603	3.39025	1650.17	2019.73	0.084435	bdl	0.0755529	0.960147	6286.05	15.6929	81.1273	94.6696	321.166	271.342	2384.82	615.875	4039.39	1821.23	602.967	1811.35	228.824	1199.78	215.803	565.211	73.8935	442.825	59.6914	0.278268	0.421746	135.438	0.00512055	98.7544	205209	11880.7	136.445	2.31296	3.37636	620855
RX6763-5	14OCB239		12.3794	130.582	2597.2	270.795	21.9939	16510	27.7692	3.25493	1545.94	1905.57	0.0316075	bdl	0.635274	1.03307	6529.75	14.0161	79.2387	103.159	275.332	245.474	2349.99	638.987	4133.37	1781.47	615.679	1935.38	226.683	1150.82	217.796	575.618	70.9465	450.131	63.989	0.633569	0.297551	138.037	bdl	142.896	234352	14201.2	195.026	3.19269	3.42301	591889
RX6763-5	14OCB240		10.0383	76.8378	1786.29	178.337	15.437	15741.6	22.8471	2.85206	1307.55	1403.43	0.119932	bdl	1.11585	1.24852	5815.18	13.4469	74.0273	102.024	189.434	224.506	2200.77	569.891	3813.56	1693.07	550.064	1751.05	206.276	1063.77	194.36	510.478	66.9563	402.167	59.327	0.440289	0.437708	133.071	0.0129587	161.808	249051	14503.1	199.357	3.07912	3.46116	583373
RX6763-5	14OCB241		13.0248	101.844	1891.18	212.472	25.482	15733.9	23.1884	3.48861	1399.01	1521.62	0.0528819	0.0348104	1.52202	0.12911	6122.42	13.0978	76.34	105.147	238.405	220.777	2233.27	579.527	3789	1700.6	573.95	1750.61	219.477	1109.7	198.045	532.977	66.8184	416.409	59.1136	0.495377	0.296214	139.587	0.0062475	264.686	243080	14408.3	359.537	2.97651	3.5073	587764
RX6763-5	14OCB242		11.5644	78.1188	2063.43	193.115	19.2358	15949.5	18.051	2.67829	1343.63	1467.34	0.096687	0.0363645	1.30092	1.34978	6236.35	13.9682	75.2067	103.39	230.702	219.615	2237.23	596.306	3943.34	1759.95	578.198	1853.35	211.888	1106.07	205.681	532.777	68.8988	417.651	62.1622	0.468192	0.35583	131.788	bdl	154.316	242927	14339.2	211.669	2.98262	3.889	587396
RX6763-5	14OCB243		11.1874	117.75	2220.18	200.992	27.33	16377.2	25.2481	2.80988	1490.18	1926.56	0.0562261	bdl	1.25346	1.1258	6448.23	14.6541	77.5325	96.7051	257.846	239.165	2370.15	623.886	4003.36	1834.88	611.419	1848.94	217.974	1160.88	217.669	561.181	69.5038	422.953	63.3255	0.714104	0.44904	131.821	bdl	130.771	233427	13691.6	163.478	3.13277	3.70759	594706
RX6763-5	14OCB244		14.4448	177.66	3364.35	233.84	36.2185	15986.1	23.9701	2.96765	1746.02	2184.11	bdl	bdl	2.45219	1.2252	6255.37	13.4426	79.4386	99.4819	335.233	300.254	2327.99	630.057	3816.59	1733.46	589.693	1857.26	221.051	1131.49	210.802	552.765	70.0089	447.551	62.5076	0.541103	0.378984	138.398	0.0477445	115.196	229130	13476.2	144.041	2.86029	3.31684	596987
RX6763-5	14OCB245		17.3785	249.87	3208.18	332.228	47.8029	17874.6	19.248	4.0501	1891.03	5168.74	0.112947	0.0371561	bdl	1.10589	5548.46	12.1204	76.7898	104.2	466.897	306.44	2431.79	598.502	3749.3	1684.27	569.344	1687.9	208.524	1085.81	192.491	522.917	67.8961	434.383	58.8513	0.427984	0.326249	153.218	0.013326	98.4452	196514	11742.1	127.847	2.05692	3.32512	624357
RX6763-5	14OCB246		35.6291	418.784	3797.73	317.959	37.3229	21477.9	41.8134	13.2244	2348.02	46431.5	0.568813	bdl	2.33554	1.75035	6646.79	13.7352	107.83	103.466	373.685	399.179	2956.01	697.525	4430.98	2041.09	662.95	2089.59	249.346	1308.53	246.475	622.892	82.0811	511.857	72.5861	0.453782	0.706089	163.45	bdl	93.4361	158099	8958.74	97.3038	1.97681	3.78155	601075
RX6763-5	14OCB247		12.7145	152.164	2829.27	250.896	35.1642	16154.9	20.1404	2.90262	1507	2040.34	0.0142173	bdl	0.41308	1.34741	5809.85	13.4724	74.7907	90.672	194.838	241.154	2189.58	602.932	3961.74	1669.74	560.231	1727.7	207.159	1075.11	200.112	538.778	68.0484	435.646	59.0275	0.633606	0.342048	136.473	bdl	128.951	247401	14779.9	159.236	3.01313	3.1956	580724
RX6763-5	14OCB248		13.127	136.606	2547.75	243.065	27.3959	16813	21.6308	2.65972	1469.39	1996.06	0.0708212	0.167684	0.148134	0.903223	6053.94	13.8414	76.8131	81.8746	198.098	249.229	2301.86	599.98	3910.63	1707.79	583.46	1789.1	207.44	1107.29	208.766	531.481	71.7856	418.281	61.9693	0.562615	0.364477	139.31	0.00667801	133.628	242294	14393.8	160.097	2.69075	3.89219	585308
RX6763-5	14OCB249		11.9683	132.854	3028.62	208.309	38.0026	15951.4	25.2625	3.00008	1437.09	1992.02	0.0567077	bdl	bdl	1.0206	6073.75	11.431	74.5127	82.5662	204.27	236.763	2247.35	583.77	3674.36	1659.93	559.474	1750.23	211.344	1076.54	195.879	521.844	63.5323	413.318	58.244	0.360915	0.253726	131.016	bdl	135.043	248903	14775.4	161.352	2.93134	3.90306	579422
RX6763-5	14OCB250		14.8472	206.437	3545.62	267.888	43.4368	16538.1	22.3152	4.31704	1765.78	6181.73	0.0754135	bdl	5.64084	3.01027	5867.62	14.3312	75.8284	101.124	415.311	264.731	2224.09	591.111	3637.39	1680.55	550.066	1733.59	211.058	1053.36	191.797	506.076	67.1799	398.816	57.2304	0.435105	0.329327	144.514	0.0315837	353.331	234680	14416.1	452.698	3.6272	3.51918	585243
RX6763-5	14OCB251		10.975	139.429	2280.74	228.126	29.1787	14953.9	21.3309	2.99363	1345.86	1869.78	0.0562693	0.0739886	0.751713	1.15232	5767.09	13.3946	71.37	88.7044	153.38	241.54	2181.89	580.823	3680.28	1622.62	553.71	1687.15	204.793	1030.09	188.767	513.913	66.82	410.817	59.0025	0.433195	0.193245	131.579	bdl	131.412	243420	14401.2	157.169	2.96457	3.64205	588481
RX6763-5	14OCB252		178.428	627.084	3947.89	309.622	31.2476	17265.9	23.4794	4.02148	1802.66	3545.92	4.3545	0.65501	0.304873	3.48624	5748.32	13.008	77.4208	107.121	263.53	349.287	2358.26	593.053	3763.29	1658.43	539.884	1713.12	207.045	1099.81	196.66	499.973	66.7449	442.239	58.5182	0.670025	0.235492	145.482	bdl	124.241	214171	12838.6	146.397	2.65274	3.23829	607222
RX6763-5	14OCB253		13.6286	194.372	2825.69	246.446	37.1584	17467.6	24.3024	5.13676	1760.84	4906.27	0.0570592	bdl	2.3526	1.26363	6255.35	13.2335	80.1894	105.477	367.136	260.199	2349.73	632.542	3907.95	1803.04	587.154	1851.28	226.067	1205.27	204.274	547.196	71.5694	441.999	64.8061	0.482688	0.326851	146.575	bdl	124.506	216798	12714.6	147.499	2.78979	3.46166	604841
RX6763-5	14OCB254		12.4958	146.681	2861.13	222.077	33.5573	17001.8	17.263	3.12381	1435.44	1955.35	bdl	bdl	0.677485	1.00552	6165.86	12.8264	75.0211	94.8805	196.494	268.374	2309.26	612.279	3938.9	1735.15	571.412	1836.66	219.078	1098.46	206.026	539.162	69.7265	411.602	60.8218	0.52682	0.415607	135.787	0.0640502	141.698	246017	14481	162.265	2.35765	3.00668	580707
RX6763-5	14OCB255		14.9782	206.067	3101.1	269.993	40.2608	16484.8	22.6959	4.5765	1760.15	7389.15	0.130472	0.0391937	1.22933	0.881748	6199.44	14.5323	80.0375	97.74	390.218	282.086	2376.04	613.332	3910.87	1792.87	593.541	1826.64	220.103	1121.32	215.905	554.371	69.1579	432.634	65.8151	0.493019	0.358191	149.22	0.00935177	127.204	214639	12742.4	141.236	2.85412	4.03919	604488
RX6763-A	14OCB256		186.909	1021.86	5874.06	507.089	70.8703	24977.2	23.4297	8.24109	2533.36	13237.7	4.91676	1.40998	3.18568	6.85301	6221.57	16.4859	92.4333	126.359	870.594	482.703	3120.46	726.162	4295.92	2029.81	652.825	1968.7	242.903	1241.54	235.018	637.317	78.9077	485.757	68.5815	0.763995	0.413394	211.874	0.0672715	86.0376	164183	9588.33	103.1	1.72861	4.07111	626483
RX6763-A	14OCB257		23.3541	330.847	4741.15	382.977	52.9199	23470.1	21.8819	6.44235	2429.46	11876.8	0.173473	bdl	0.915418	1.01161	6007.3	16.9016	92.168	124.772	643.85	394.834	2868.07	673.603	4245.04	1817.56	613.587	1901.82	233.999	1194.24	217.815	577.395	75.9672	463.603	65.4741	0.673633	0.460461	192.795	0.0271813	97.21	191123	11317.6	122.632	2.45044	4.65759	608172
RX6763-A	14OCB265		64.2127	521.93	6786.72	414.215	83.8625	21435	32.0902	6.2274	3108.53	6368.94	196.086	10.3664	2336.1	12.6336	5624.99	17.4918	84.704	152.667	636.836	708.76	3331.13	693.712	3827.15	1629.72	552.297	1713.8	217.896	1054.5	202.608	520.443	70.9746	446.4	64.0727	0.525853	0.32612	203.036	0.0290187	149.406	142878	8356.57	229.435	6.09386	5.52991	658851
RX6763-A	14OCB267		52.746	620.458	9733.1	486.737	124.771	25073.5	32.1411	7.506	3620.76	5063.13	0.256313	bdl	0.366896	11.9328	6052.89	17.1858	98.2124	151.372	1018.17	601.245	3305.3	752.389	4398.45	1941.57	662.812	1892.72	242.116	1307.86	225.141	589.515	80.7133	503.628	66.5566	0.478112	0.317621	244.119	bdl	57.2778	150237	8808.9	90.9535	1.48021	5.99755	642661
RX6763-A	14OCB269		3096.23	6683.3	18473.5	569.762	64.469	20629.1	25.3448	11.0917	2846.74	31530	80.6536	18.3229	2.80312	42.3273	5544.47	15.9241	93.5115	140.741	475.912	769.361	3434.43	723.265	4320.29	1857.77	641.589	1751.9	223.417	1144.29	205.582	571.571	74.1029	459.372	67.0073	0.51158	0.308936	226.55	bdl	175.361	131686	8019.44	216.221	1.67353	4.70256	604000
RX6763-A	14OCB270		22.4184	303.503	3775.77	323.347	48.9268	21076.9	26.488	5.39504	2076.89	8208.9	0.252081	bdl	1.19759	0.13492	5936.51	14.6773	83.973	109.773	565.954	362.514	2646.9	614.428	3901.87	1701.12	563.979	1691.17	210.685	1100.13	209.193	541.947	71.4593	439.566	60.9824	0.683652	0.368595	161.373	0.0107959	91.095	180629	10504.4	105.819	1.58785	4.33176	630390
RX6763-A	14OCB271		29.6431	406.991	5517.63	516.065	78.0406	24286.2	35.1405	5.07346	2703.74	3060.37	0.169202	bdl	1.72253	0.283682	6399.22	17.3669	101.152	127.231	844.977	461.064	3079.09	730.861	4548.3	2045.69	666.755	2028.58	246.862	1254.16	229.09	600.364	79.0619	503.517	70.7874	0.473536	0.37893	212.913	0.071872	100.568	186761	10668.1	114.929	1.84547	4.96296	618902
RX6763-A	14OCB272		17.9736	250.842	3694.8	328.147	52.2316	19395.7	21.8385	4.11885	2030.74	2387.88	0.0577762	bdl	1.93435	1.25383	5512.9	15.2024	80.8654	103.962	545.846	329.145	2450.8	618.254	3747.01	1721.33	552.353	1687.73	214.791	1082.58	196.855	527.718	70.0776	424.781	59.4367	0.48991	0.355907	162.8	bdl	105.527	208249	12051.6	128.852	2.31733	4.18276	613309
RX6763-A	14OCB273		73.9872	661.917	5622.45	322.854	60.7856	20090.1	34.022	4.67601	2608.55	29573.4	789.633	14.7268	25499.9	11.6153	6051.9	14.9302	97.7132	107.354	575.938	367.915	2629.1	643.955	4080.51	1818.81	589.687	1745.83	224.658	1154.54	215.998	555.352	71.2687	467.349	61.256	0.387506	0.289319	174.485	0.165195	2956.12	226772	15823.3	3456.69	18.1725	3.85776	515355
RX6763-A	14OCB274		36.6442	468.674	6064.2	434.02	138.364	23464.2	23.8131	4.68256	2808.7	3410.81	0.124062	bdl	1.95139	2.74102	7386.46	17.2791	116.981	128.431	797.804	439.318	3250.24	756.448	4811.78	2132.09	725.942	2189.34	276.8	1414.49	263.912	677.599	89.147	568.781	78.0426	0.609323	0.469181	217.422	0.0611257	98.2126	172723	10067.4	121.949	2.20016	5.09392	629982
RX6763-A	14OCB275		27.5303	302.047	4013.64	282.824	97.2752	20831.6	28.8858	4.71447	2176.45	3561.62	57.4404	0.859203	1634.27	2.08608	6860.55	16.4955	102.533	114.483	463.294	332.996	2830.03	706.663	4580.51	2028.69	680.234	2012.61	242.133	1272.79	227.241	602.061	82.8591	468.864	69.7015	0.416692	0.505443	177.305	bdl	212.333	210874	12447.1	270.907	4.31743	5.11546	600231
RX6763-A	14OCB278		18.4921	241.133	4015.72	314.464	47.789	21582.2	27.1459	4.08092	2241.17	3934.27	10.2788	0.584799	1084.37	2.0749	7119.24	17.4588	111.494	124.006	563.203	330.503	2884.6	723.527	4707.48	2099.38	703.909	2068.39	266.584	1371.65	244.144	659.027	84.8393	508.313	71.4021	0.595854	0.57856	196.405	0.140385	375.723	207127	12373.3	574.741	4.26206	4.85804	601677
RX6763-A	14OCB279		21.6796	286.634	4625.85	421.919	58.2583	21763.3	29.9805	4.64486	2501.15	3104.22	2.85715	0.0808544	292.717	0.526887	7250.82	16.4736	111.536	116.91	616.297	344.901	2948.38	756.466	4777.02	2170.77	704.247	2138.87	267.224	1380.73	260.566	669.132	85.5507	533.259	74.0699	0.521836	0.55141	203.623	bdl	802.885	208599	13017.3	1213.55	3.02786	5.31127	598005
RX6763-A	14OCB280		22.3125	296.714	4357.5	370.461	54.0458	20671	25.3568	3.44024	2477.05	5414.24	60.4488	1.99009	3449.59	2.87208	6548.08	17.093	109.333	115.679	525.307	370.871	2970.92	711.307	4494.56	2019.62	652.821	2049.7	249.239	1283.77	230.128	628.327	80.7705	506.056	73.0917	0.61499	0.487251	189.276	0.0390258	200.861	191854	11124.9	229.802	11.4815	5.09588	614424
RX6763-A	14OCB281		27.2379	387.774	6031.72	484.39	66.3224	26540.7	29.2568	5.12115	2973.28	3322.36	0.108265	bdl	bdl	0.353411	6408.02	16.6689	106.016	131.629	628.987	449.706	3145.16	720.235	4554.69	1994	667.474	1969.5	234.271	1301.35	231.054	614.326	79.0249	520.222	71.4105	0.525684	0.401723	205.578	bdl	104.507	177665	10468.3	134.699	2.00421	5.45433	623633
RX6763-A	14OCB282		33.656	523.781	5835.94	438.018	77.3117	24451.5	30.4843	6.18838	2669.31	3265.75	0.313261	bdl	15.0927	3.39006	6599.37	16.4078	111.256	128.767	778.945	420.179	3164.94	748.409	4660.25	2139.52	676.879	2077.61	248.575	1292.32	236.452	613.576	87.2617	516.835	71.4779	0.518959	0.551981	215.145	bdl	127.252	169363	9911.26	169.825	2.15371	5.43208	634392
RX6763-B	14OCB283		25.7298	217.07	1748.43	194.999	170.38	16259.6	25.5765	3.36009	1451.22	1662.64	0.167996	bdl	bdl	0.984112	6160.1	7.7723	82.0247	110.131	203.544	230.141	2370.83	609.074	3961.33	1787.03	601.849	1861.92	215.075	1103.98	209.466	546.637	69.9825	443.149	63.8362	0.417247	0.263975	144.295	bdl	154.676	237821	13857.5	192.609	3.16817	1.28492	591933
RX6763-B	14OCB285		28.8737	211.646	3485.08	322.307	54.9653	18816.7	23.3447	4.55917	1934.59	3968.83	0.732709	0.171078	1.48437	2.02345	6480.14	7.17397	93.9633	117.094	317.228	373.806	2636.87	682.134	4207.9	1922.76	630.22	1939.96	230.973	1247.85	222.063	586.948	77.7241	476.344	65.692	0.439466	0.32437	172.938	bdl	126.771	207683	12312.3	156.396	2.76128	1.47483	610278
RX6763-B	14OCB286		31.5347	366.235	4137.9	303.407	90.2884	18803.5	24.0307	3.94043	2054.9	3350.66	0.262595	0.268928	0.886542	1.40216	6126.73	7.94657	89.881	110.85	432.458	322.05	2612.1	648.768	4052.62	1878.4	605.31	1764.4	226.987	1186.54	214.385	567.526	74.1012	459.246	63.8801	0.41804	0.385212	170.569	0.0346826	118.411	202597	11994.8	151.814	2.26408	1.36521	615529
RX6763-B	14OCB287		16.2698	146.054	2893.07	262.666	41.9967	17191.7	18.8995	3.18898	1693.14	5282.99	397.726	15.9045	3695.61	2.43874	6062.82	7.50152	84.7485	106.489	294.126	263.999	2395.13	612.209	3868.87	1742.85	586.564	1768.99	211.305	1133.2	197.763	550.532	70.0392	439.423	59.2625	0.319965	0.324273	149.932	0.0914995	166.714	225862	13355.2	217.132	7.99642	1.38457	591375
RX6763-B	14OCB288		470.707	654.612	8441.2	779.087	179.151	18598.9	29.8705	7.65348	1902.04	5068.44	3.36045	0.530517	26.9112	6.31704	5502.95	9.3434	119.462	167.295	8182.23	1054.21	3421.07	744.725	4357.46	1879.03	574.464	1684.65	209.994	1109.04	208.731	554.375	71.2742	445.63	61.3182	0.577443	0.313756	220.999	0.00426016	262.349	145651	8734.11	327.978	2.12323	1.57638	651434
RX6763-B	14OCB289		50.8413	637.129	4348.6	318.921	203.614	21224.6	27.3669	4.39565	2059.02	3096.14	0.232115	bdl	1.10254	2.44046	6817.2	6.84673	90.2533	115.941	537.144	319.91	2655.98	677.697	4426.29	1929.03	637.304	1944.23	245.239	1267.08	235.626	616.109	78.024	509.643	67.8738	0.416908	0.329244	175.958	0.00906738	118.286	194756	11416.9	143.691	2.89785	1.36486	617985
RX6763-B	14OCB290		25.3873	319.974	4633.47	358.535	62.9525	19831.9	24.2568	6.16317	2243.66	8181.01	0.37219	0.404315	19.3384	1.74751	6785.48	7.03278	93.3968	125.45	458.922	339.21	2738.77	699.572	4374.53	2041.04	658.885	2042.06	252.962	1342.73	235.263	628.265	83.1832	521.281	72.82	0.357669	0.235488	195.323	0.00974707	133.019	192466	11347.4	149.472	2.8057	1.31821	615028
RX6763-B	14OCB291		55.4264	695.88	5655.66	373.959	333.564	20224.4	22.0563	5.92914	2148.01	17838.9	126.033	5.98975	12016	1.82461	6255.48	7.55876	86.6539	112.767	502.362	329.817	2552.56	655.99	4167.54	1949.21	607.218	1909.2	239.191	1278.47	232.153	603.719	77.7895	514.298	69.9527	0.328507	0.242398	174.27	0.0393526	475.029	187293	11171.4	647.52	14.9647	1.20328	591926
RX6763-B	14OCB292		75.8668	637.884	6472.94	535.349	183.957	22654	25.4404	5.31147	2566.79	4932.1	0.324473	0.213726	0.120832	1.07871	6421.86	7.91552	101.774	149.327	882.282	526.368	3131.72	712.54	4502.82	2017.52	652.755	2043.42	272.659	1287.93	250.976	645.142	84.803	523.309	76.3948	0.185156	0.381675	229.474	0.00234366	92.007	159867	9487.24	118.883	2.03869	1.62558	642710
RX6763-B	14OCB293		27.8955	329.649	4642.58	334.05	114.793	21769.7	22.4854	4.45197	2133.03	3474.65	0.207982	0.0391446	1.39131	0.362045	6561.41	8.12682	92.9683	116.612	584.777	334.359	2755.67	713.344	4413.52	2028.26	685.804	1991.66	253.503	1318.8	232.555	639.509	81.8457	512.126	72.9983	0.262684	0.403641	188.408	0.0212553	108.297	202720	11927	145.952	3.06191	1.53967	608555
RX6763-B	14OCB294		101.597	1063.48	7549.64	470.58	324.229	22752.3	28.7349	11.055	2845.69	14474.1	1.24825	0.231942	1.01192	2.00127	6675.93	8.72249	98.9251	137.949	574.887	462.593	3114.72	748.648	4570.28	2089.01	686.766	2014.55	251.236	1376.66	248.366	644.629	87.0935	525.22	76.6044	0.639909	0.34227	222.423	bdl	99.7634	175650	10192.4	120.519	1.92628	1.22578	611635
RX6763-B	14OCB295		38.9623	460.059	4774.88	332.469	79.495	21063.8	21.949	8.03598	2244.13	11927.9	0.292077	0.0399863	0.799707	1.42869	6567.87	8.66769	92.1264	120.702	647.592	339.341	2742.65	691.896	4252	1965.25	646.125	1909.86	242.468	1296.8	234.355	623.611	81.0474	481.939	70.5534	0.280082	0.31238	188.06	bdl	109.224	185882	10813	134.599	2.57141	1.43747	615654
RX6763-B	14OCB296		19.466	311.696	3845.57	306.838	125.224	20099.7	24.1977	4.56863	2061.56	4222.56	0.189128	0.312764	bdl	2.14247	6525.01	8.62767	92.4476	114.545	472.676	310.834	2622.5	681.905	4227.13	1936.52	654.487	1955.53	234.552	1259.5	226.491	611.876	78.3956	491.911	69.2542	0.665687	0.328136	171.345	0.0236123	115.877	202547	11802.9	145.225	2.11743	1.45393	612484
RX6763-B	14OCB297		31.8082	415.472	4514.58	397.001	98.3312	20689	22.0053	4.57016	2223.4	4135.31	0.246757	bdl	bdl	1.72069	6877.28	7.36041	93.1813	115.471	676.438	343.163	2752.68	695.504	4383.76	2011.64	686.371	2053.98	254.56	1308.17	229.83	637.279	78.4951	517.042	72.5412	0.317409	0.284472	188.778	0.00938414	114.408	192711	11056.4	133.425	2.49914	1.57104	618845
RX6763-B	14OCB298		32.2186	381.558	4390.48	369.845	84.2879	20968.8	24.4188	5.42441	2300.14	7186.42	0.248349	bdl	2.2161	2.02665	6647.37	9.13199	89.7568	118.381	529.705	362.484	2742.07	688.208	4557.22	2008.84	667.405	1971.04	256.107	1340.71	238.153	627.18	83.3803	509.757	70.522	0.398739	0.265626	179.708	0.0051054	112.661	172758	10051.7	122.861	2.10717	1.59382	635149
RX6763-B	14OCB299		25.2444	335.774	4024.84	349.731	158.8	20866.8	25.3747	5.07918	2105.3	6315.68	0.300973	bdl	1.4472	3.08787	6698.07	9.81429	91.3458	125.353	469.692	310.125	2665.16	681.367	4409.18	1976.56	656.277	2029.07	240.611	1271.69	232.735	630.984	78.6184	507.354	72.8196	0.43799	0.32875	174.236	0.0194315	116.206	202538	12001.4	153.835	2.84068	1.34672	607527
RX6763-B	14OCB300		36.5432	300.713	3529.78	331.741	57.2023	16123.8	23.4716	8.85428	1864.65	57986.8	1257.71	58.2658	44434.2	6.75716	5242.51	7.95208	71.6834	96.9068	378.191	265.568	2174.09	550.39	3467.23	1601.16	525.693	1574.82	196.942	1026.75	173.336	484.075	62.101	391.835	58.7547	0.342192	0.240887	145.273	0.118651	2524.67	212276	14670.7	3725.65	38.6598	1.12778	486759
RX6763-B	14OCB301		34.1411	408.59	5016.58	397.342	75.6554	21874.6	26.8846	4.94831	2322.44	4528.69	0.229223	0.0805854	1.0576	1.18815	7196.16	11.1615	96.7197	127.414	703.945	351.652	2854.46	719.936	4636.89	2090.86	721.105	2098.53	267.26	1391.04	252.908	688.385	82.2715	551.635	77.2988	0.5218	0.344584	201.448	0.0901992	118.986	195165	11520.8	143.364	2.43862	1.29089	611860
RX6763-B	14OCB302		25.5937	243.915	3019.41	227.197	144.377	16856.2	21.4277	2.79237	1644.37	1877.94	1.72043	bdl	bdl	2.58915	6640.33	7.25647	84.1063	105.022	278.395	254.287	2446.09	652.902	4136.35	1928.25	618.235	1938.68	229.578	1217.6	217.664	599.838	73.9052	466.605	66.2442	0.3153	0.380659	156.778	bdl	146.563	228004	13253.4	203.267	3.26797	1.95273	596715
RX6763-B	14OCB303		21.7176	197.334	2293.77	234.505	69.7094	16415.1	24.4784	3.48502	1441.19	1609.54	0.0446195	0.253436	1.5629	1.55552	6021.23	8.16862	81.4415	107.461	239.351	224.214	2330.58	608.474	3940.84	1786.99	607.552	1798.52	217.754	1146.35	209.912	562.177	69.6186	424.394	62.2679	0.211581	0.29423	146.506	bdl	154.547	237793	14005	191.788	2.91204	2.31235	590954
RX6765-4-5	14OCB318		119.408	464.832	2342.88	178.35	48.325	22306.4	101.541	5.40668	1599.73	3819.05	2.55961	1.13953	5.14186	0.216196	6750.09	31.0032	9.55136	61.935	381.892	325.199	2721.01	695.499	4099.27	1689.79	539.615	1680.29	197.527	1065.78	203.469	576.947	76.2286	462.262	63.6062	0.857719	0.0924942	78.1173	0.0428782	135.056	213911	12566.4	187.316	2.57104	0.97755	602933
RX6765-4-5	14OCB319		12.8893	105.866	2274.12	168.431	27.0466	21722	88.019	4.89486	1481.87	2211.33	0.13167	0.0794747	4.12059	bdl	6605.68	28.738	10.0154	59.7875	137.36	309.953	2667.67	675.697	4192.04	1598.24	516.711	1631.75	196.413	1016.71	200.501	568.786	70.9916	455.798	61.6222	1.11126	0.0473739	80.2308	0.031313	127.834	220929	12637.9	193.688	2.52509	1.0856	600677
RX6765-4-5	14OCB320		164.064	427.845	5500.6	335.313	41.6177	25560.6	117.127	5.76274	2206.05	4130.65	0.148138	0.140437	3.58896	0.416958	7090.92	31.3292	10.8994	75.5521	195.158	391.106	3003.11	723.124	4517.83	1765.42	586.405	1704.56	211.279	1148.68	227.835	604.3	80.3693	480.288	70.088	1.07509	0.174163	84.8715	bdl	123.795	182111	10299.5	156.339	2.06588	0.989171	622565
RX6765-4-5	14OCB321		24.8128	232.186	3245.93	325.588	38.6659	25694.3	98.3169	5.76406	1864.67	2930.58	0.142476	bdl	5.20321	2.85443	6560.96	26.1791	10.4068	65.0525	301.343	375.514	2908.63	687.783	4292.39	1636.17	529.47	1619.15	193.986	1077.96	206.577	565.182	75.3222	474.288	64.193	1.02646	0.0542636	80.7403	0.0374205	111.108	189973	10527.9	163.963	2.2792	0.999116	622793
RX6765-4-5	14OCB322		140.053	345.539	3951.49	266.634	41.6157	22658.5	92.1281	5.78308	1899.78	3491.59	0.191129	0.0420684	5.82081	0.51423	6803.28	29.4156	9.66926	66.8334	159.934	348.193	2957.98	699.649	4307.9	1680.1	558.478	1685.59	206.363	1082.8	215.821	611.404	74.5747	490.136	64.9187	1.61466	0.0900044	87.0817	0.00764702	138.105	212647	12169.8	191.347	2.13266	1.03694	600649
RX6765-4-5	14OCB323		94.3309	398.681	4105.38	302.246	113.726	24987.3	110.819	5.84795	1958.24	3906.57	0.159839	bdl	6.17524	0.906266	7083.06	27.6741	11.3485	70.7394	208.825	381.134	2915.47	777.034	4401.4	1741.68	572.863	1764.97	211.949	1125.05	216.496	613.256	78.058	489.502	66.7561	1.34814	0.0642036	82.7412	0.0449194	119.906	196301	11432.6	175.701	2.78618	0.926387	612219
RX6765-4-5	14OCB324		136.97	743.565	3948.05	163.352	527.431	25210.7	85.8566	5.15976	1528.36	3983.76	0.599132	bdl	4.13236	1.86689	7170.24	27.9133	10.6781	64.0697	277.909	322.889	2737.62	711.691	4483.4	1834.02	567.696	1727.79	205.488	1111.63	214.372	580.889	78.231	485.837	69.8471	1.01741	0.0967365	80.8324	bdl	119.856	190734	11240.1	166.341	2.39437	0.94298	617442
RX6765-4-5	14OCB325		346.598	1060.32	4851.36	286.858	48.4482	21584.7	103.436	6.09575	1895.57	55403.3	1571.78	48.0299	45373.8	17.8672	6234.87	25.5794	9.13986	59.6585	199.465	339.645	2707.97	645.108	4026.01	1588.52	507.362	1545.89	185.136	987.937	188.692	532.033	69.4504	430.955	61.8833	0.843006	0.0170656	65.4719	0.253681	321.601	147945	8793.92	405.54	7.68019	0.967832	547533
RX6765-4-5	14OCB326		1599.6	1570.55	11257.7	377.461	61.1823	24960.7	122.269	7.26781	2677.05	8526.46	0.314728	bdl	36.9992	0.928336	7128.77	24.3783	10.4083	81.4439	165.879	450.105	3168.49	730.86	4474.25	1795.55	569.404	1695.65	214.339	1094.99	217.194	589.132	78.4684	495.18	71.7361	1.06367	0.105401	90.501	0.00746032	192.925	160000	9271.59	303.661	1.59363	1.03921	623830
RX6765-4-5	14OCB327		156.821	466.344	4328.46	313.392	46.816	26603.1	98.6929	7.00246	2213.91	4373.56	0.115133	0.0434575	4.65714	0.823092	6830.49	24.847	10.0172	75.4113	274.727	398.738	3027.38	716.8	4222.02	1707.75	546.828	1635.51	196.237	1088.36	213.451	576.79	76.6454	464.678	66.4989	1.03676	0.0464763	86.7191	0.0157889	113.781	183978	10709.9	162.727	2.14904	0.916455	621832
RX6765-4-5	14OCB328		228.019	1440.68	7017.13	224.703	76.809	20894.6	83.0548	6.45342	2010	33691.2	568.451	6.50203	23753.5	5.13307	5550.5	20.2988	9.03691	58.9985	1121.66	335.037	2512.71	595.468	3566.64	1475.46	455.09	1334.58	159.944	884.918	167.912	471.866	62.353	377.283	51.2474	0.863284	0.0632112	73.2208	0.0920247	2017.11	244763	16530.9	3015.64	5.86856	1.03088	494094
RX6765-4-5	14OCB329		82.3525	524.621	4287.32	278.717	59.3572	25886.8	93.5001	5.89216	2360.13	5738.05	0.868794	0.188697	3.57934	2.12618	6914.75	24.5943	10.9201	68.5347	235.715	400.404	2999.34	712.239	4463.55	1686.64	560.681	1679.94	203.7	1095.01	203.546	589.1	76.883	477.39	65.6437	1.42888	0.0896822	82.9427	bdl	108.193	178667	10279.5	153.451	1.92403	1.14478	626126
RX6765-4-5	14OCB330		674.466	1935.64	5494.51	189.4	56.5463	24353.3	102.273	6.92497	1791.71	9297.81	21.228	4.59686	9.8475	8.02295	6568.65	25.2313	10.4927	66.4859	248	336.337	2754.21	688.446	4297.59	1677.76	540.257	1627.6	194.962	1081.37	199.793	557.409	70.1567	437.682	65.7442	1.08253	0.112352	81.2911	0.0662488	141.829	210442	11799	201.027	2.4674	1.19511	588203
RX6765-4-5	14OCB331		59.6677	336.061	2180.93	143.697	36.1123	20865.9	89.0444	4.77266	1401.8	3133.69	0.945699	0.424994	5.81105	2.20034	6315.31	22.6224	9.10094	56.9829	141.974	271.33	2540.68	648.816	4065.67	1601.37	511.29	1553.99	179.149	987.228	195.842	522.261	69.0245	443.34	60.5286	1.00076	0.0432784	74.3691	bdl	159.538	228249	12852.2	213.936	2.36309	1.19981	594082
RX6765-4-5	14OCB332		105.133	354.938	3001.33	206.367	44.2092	22427.4	101.74	6.16396	1690.66	8023.46	0.608681	0.0814587	4.86937	2.01497	6520.71	22.8169	12.3954	63.67	158.078	322.663	2766.59	672.231	4123.96	1617.82	537.854	1673.43	184.619	1016.4	199.173	555.125	72.6613	451.895	60.9803	1.17346	0.124421	75.7973	bdl	137.361	207549	11980.9	184.104	2.55112	1.36477	603515
RX6765-4-5	14OCB334		69.0474	469.611	3514.36	234.956	191.613	22684.9	85.4458	5.468	1809.47	6154.88	63.4928	0.744167	3851.49	1.69499	6575.7	22.5922	10.6328	61.7009	322.765	345.951	2751.91	692.911	4322.24	1681.29	537.923	1647.56	197.219	1087.6	205.464	561.658	74.5582	449.448	64.7673	1.0139	0.120412	80.5929	0.0316364	120.788	195845	11157.1	183.154	2.98702	0.948605	611127
RX6765-4-5	14OCB335		300.269	1909.17	6712.73	227.795	155.44	25509.9	98.5903	6.91277	1995.12	7803.46	0.215135	bdl	4.38	3.65003	6616.93	21.9651	10.5083	71.9345	411.773	379.554	2909.64	707.891	4466.67	1655.35	539.522	1660.62	200.134	1093.69	200.804	566.267	74.9638	465.067	65.8625	0.850789	0.145785	82.1277	0.0161901	141.189	194415	11108.1	172.223	1.97631	1.08863	601798
RX6765-4-5	14OCB336		21.0459	153.641	2100.76	156.678	41.0115	23041.3	104.547	5.15296	1544.38	2503.67	0.279598	bdl	6.30529	1.88284	6659.54	22.8285	9.80469	65.4805	182.191	303.172	2694.27	654.302	4148.89	1649.66	534.989	1614.96	193.455	1072.71	195.292	561.485	70.748	449.539	62.9028	1.03576	0.0387039	75.5473	0.0817558	127.81	229298	13273.9	191.891	2.54525	1.09641	590128
RX6765-4-5	14OCB337		88.4959	693.714	4807.52	212.735	96.9339	24626.4	93.2366	5.6519	1945.63	4569.77	0.506003	0.464394	5.61887	bdl	6686.5	22.9657	10.1339	65.0994	347.358	370.199	2933.53	716.537	4212.17	1675.26	544.168	1691.23	196.987	1080.59	207.823	553.43	74.881	460.758	64.1926	0.813288	0.113463	85.0625	bdl	143.906	199124	11774.6	164.128	2.27432	1.25863	608148
RX6765-4-5	14OCB338		419.509	910.031	6130.67	303.99	54.0494	25980.5	105.477	7.56374	2164.55	6259.49	2.1983	0.647057	5.80541	2.55455	6992.76	23.9146	10.1698	75.1817	244.604	386.444	2994.3	730.125	4330.26	1742.03	572.788	1708.79	209.234	1104.52	217.738	601.132	79.5401	471.917	66.6292	1.20444	0.082994	85.8278	bdl	116.461	180223	10530.9	164.15	1.96787	1.58838	619053
RX6765-4-5	14OCB339		223.873	770.343	5326.44	267.458	140.339	25285.9	110.086	6.92055	2075.74	6299.03	1.48229	0.82404	3.7388	0.815754	6891.2	23.9824	10.895	74.444	283.764	375.509	3017.14	712.203	4416.21	1771.36	544.977	1781.81	197.616	1125.68	218.932	593.979	76.7002	479.671	68.5581	1.18292	0.0788928	88.4347	bdl	129.892	197743	11446.1	162.331	2.29646	1.5511	604357
RX6765-4-5	14OCB340		46.6242	464.855	5180.31	286.128	63.8206	28347.4	107.38	6.13782	2329.26	5548.63	4.02476	bdl	687.422	6.18067	6721.33	23.4473	11.3383	72.6194	536.927	400.225	2975.79	683.572	4317.2	1737.79	560.811	1636.18	206.753	1098.27	205.447	569.306	76.0015	477.919	64.4674	1.23438	0.118176	88.5985	0.027204	128.106	173112	9986.42	162.539	1.88272	1.02086	626678
RX6765-4-5	14OCB341		82.1504	369.699	3151.97	224.39	38.2889	25578.3	91.0503	5.63025	1895.52	3936.37	2.24525	1.37033	4.67448	1.7525	6604.45	24.3776	10.0802	61.5183	293.13	359.223	2960.18	675.616	4282.86	1670.5	535.594	1682.51	199.838	1066.75	204.626	567.711	72.7328	481.153	64.3531	1.22279	0.0743858	80.1789	0.0289242	110.727	201568	11775.7	170.417	2.28343	1.23488	609351
RX6765-4-5	14OCB342		54.6827	272.406	2372.37	114.371	183.647	21132.2	106.851	5.07666	1430.77	2433.61	0.102668	0.174571	6.26935	0.544573	6462.26	23.0421	9.47104	59.6228	176.627	299.512	2665.41	683.277	4361.39	1759.72	531.228	1696.14	188.582	1027.93	204.931	551.801	74.9659	460.362	64.2561	1.0828	0.0663305	73.9325	bdl	137.153	221511	12716.2	198.258	2.37283	1.31006	599651
RX6765-4-5	14OCB343		377.753	1078.53	5996.87	265.625	48.8236	22857.2	108.053	7.14368	2154.2	7143.08	8.34419	1.49212	17.8665	4.07253	6712.52	23.2345	10.0566	64.581	163.872	355.177	2910.47	691.02	4170.69	1677.77	528.05	1742.25	193.986	1061.6	204.974	580.474	78.1924	463.475	63.2931	1.10035	0.0885812	87.3322	0.0150278	99.0498	182332	10596.3	154.943	1.95429	1.3904	620771
RX6765-4-5	14OCB345		28.6727	234.04	2775.02	180.752	103.646	20895.2	96.0694	5.94129	1570.75	2574.41	0.50826	bdl	83.3302	0.533656	6293.15	24.0715	10.2522	66.0395	278.283	297.421	2714.25	650.179	4157.13	1744.08	539.204	1646.61	197.825	1073.28	198.233	546.624	73.891	442.75	59.7943	1.16069	0.102789	80.3499	0.00264171	164.081	227409	13283	198.608	2.99555	1.11489	592964
RX6765-4-5	14OCB346		10.398	107.334	1559.29	121.699	33.7332	22027.5	92.8709	5.04205	1440.27	2119.5	0.0439944	bdl	10.4439	2.42763	6605.1	25.6666	8.5942	60.8955	146.755	290.275	2685.29	655.679	4104.62	1572.18	521.637	1632.39	185.825	1045.44	198.411	561.261	69.6909	452.126	63.729	1.35384	0.0413462	77.2989	bdl	134.927	238655	13780	203.907	2.36508	1.0134	584068
RX6765-4-5	14OCB347		30.4601	193.765	2287.42	113.615	43.2644	23653.4	96.127	5.91816	1538.77	3136.05	0.546473	0.144591	3.55635	0.226846	6564.38	25.7326	11.0452	65.6759	176.627	300.547	2809.79	698.354	4230.74	1678.24	522.183	1673.5	200.208	1036.02	204.229	557.996	72.9243	450.49	63.3212	1.20883	0.099622	81.5138	0.00499025	154.046	216454	12585.5	197.659	2.47731	1.15389	600868
RX6765-4-5	14OCB348		264.207	718.497	3956.02	194.965	48.7523	23080.7	98.5111	5.27476	1746.98	5116.11	8.71431	1.19337	5.08693	6.63049	6878.84	23.9978	9.14414	64.5784	204.28	317.724	2809.56	676.395	4121.99	1635.66	525.078	1607.95	196.293	1069.79	205.433	566.033	77.7096	479.35	65.9782	1.11031	0.0910645	79.8601	bdl	130.745	209902	12001.6	179.272	2.09108	0.616768	600884
RX6765-4-5	14OCB349		12.2333	123.882	2495	196.594	39.684	22973.1	94.1029	5.74774	1563.64	2438.21	0.203897	bdl	28.5604	0.232345	6444.21	22.8336	10.261	61.4423	178.234	304.396	2674.26	696.894	4158.25	1686.41	518.552	1620.06	193.536	1018.35	208.829	568.898	71.2079	443.915	63.5397	1.15995	0.0658744	76.7974	bdl	125.784	226519	12882.7	192.82	2.64859	0.690082	592745
RX6765-4-5	14OCB351		19.5455	153.859	1385.14	113.028	65.5874	22347.9	85.4309	4.43256	1285.22	2481.64	19.1624	bdl	779.108	1.49542	6337.68	21.3306	9.09471	55.0742	108.686	275.259	2614.4	659.482	4226.77	1699.75	532.697	1594.25	197.396	1044.79	198.102	549.9	72.0233	447.048	62.3269	1.23037	0.0453847	78.2938	0.0315414	153.084	238884	13865.2	216.913	2.83582	0.786371	582642
RX6765-4-5	14OCB352		48.1719	194.596	1853.9	85.0572	38.0026	21802.6	80.8377	4.963	1421.72	10691.5	66.0179	1.14639	6821.67	1.98312	6204.98	21.5037	9.80517	60.5781	141.936	279.317	2570.13	671.645	4083.28	1566.26	545.998	1583.31	185.347	993.611	193.065	524.593	72.4631	449.734	61.8514	0.907377	0.12467	73.7193	0.103161	148.923	226562	13222.4	214.503	2.87297	0.75748	578028
RX6765-4-5	14OCB353		684.627	2037.62	4922.24	144.271	38.5889	20789	95.4503	5.45213	1649.21	8682.95	21.3591	4.72982	48.2116	9.66787	6624.82	22.2241	10.1337	58.6312	151.747	280.223	2555.81	658.482	4165.02	1668.59	516.86	1655.41	192.814	1047.5	201.635	562.152	77.8765	445.103	59.2803	1.23392	0.0856769	76.1469	0.015641	129.361	214193	12334.1	193.481	2.8552	0.775264	590974
RX6765-4-5	14OCB354		18.8322	182.28	2661.79	176.662	41.6404	24259	108.122	5.1241	1731.19	5686.4	32.0161	0.739112	1545.46	bdl	6772.82	22.6676	10.702	62.9224	264.485	343.861	2895.26	715.095	4261.13	1789.36	565.719	1651.37	209.286	1116.5	205.638	573.397	76.9617	477.897	64.8765	1.23513	0.0631491	80.1328	0.0560689	138.454	207926	11889.6	182.51	2.49836	0.723224	602158
RX6765-4-5	14OCB355		55.4059	356.588	3401.31	211.892	65.9597	22243.9	87.6316	5.85159	1661.27	4295.98	0.286289	bdl	7.04263	1.77055	6714.46	24.6367	9.7162	69.491	271.141	327.873	2790.29	669.605	4278.89	1659.66	534.326	1619.23	198.411	1045.21	200.691	563.993	75.4391	435.89	63.8339	1.14077	0.0938072	77.7319	0.0463736	144.144	217893	12818.8	190.498	2.09424	0.794656	596588
RX6765-4-5	14OCB356		104.183	351.942	2943.48	203.61	51.0851	22917.2	87.5845	5.73868	1735.01	3633.77	2.7431	0.510034	6.15414	5.19207	6925.18	23.5128	10.3453	63.1433	251.497	326.515	2897.71	722.513	4303.76	1760.54	548.845	1683.77	206.946	1077.58	208.952	598.712	74.8111	491.293	62.963	1.11583	0.0852503	82.0907	bdl	141.513	216824	12645.1	188.33	2.75472	0.752334	597789
RX6765-4-5	14OCB357		170.92	485.492	6132.52	352.437	55.099	27457.2	91.6447	6.00155	2536.16	5316.8	0.117437	bdl	3.58372	1.05624	7018.93	23.1083	9.71235	75.2413	253.854	421.487	3134.42	738.4	4449.5	1774.74	588.842	1759.05	200.306	1172.91	218.079	595.923	79.0276	486.844	69.9596	0.875886	0.0948679	88.8891	bdl	645.872	188001	11404.6	945.227	2.08912	0.799865	608999
RX6765-4-5	14OCB358		17.2986	241.283	2528.16	96.6978	55.3906	24815	98.1869	6.41355	1690.66	7018.68	38.5022	0.194515	2232.72	1.89736	6787.47	9.74835	8.91257	65.003	234.456	324.127	2849.8	700.339	4392.79	1729.15	553.32	1642.65	203.243	1081.75	207.994	580.484	75.0673	485.045	63.4475	0.390437	0.101541	83.793	bdl	154.104	213660	12311.3	183.781	2.61236	2.31711	593607
RX6765-4-5	14OCB359		19.7779	222.954	2916.27	146.475	81.8085	22883	85.428	5.80121	1616.7	4371.01	0.195679	0.190355	5.32421	0.825177	6948.74	9.82348	8.4247	62.0798	222.623	307.045	2691.27	695.165	4274.96	1651.48	534.434	1679.45	205.545	1052.44	209.079	547.485	70.4958	458.572	64.1645	0.603891	0.0477464	85.0386	bdl	155.441	213399	12537.2	183.735	2.39798	2.56053	601433
RX6765-4-5	14OCB360		28.5734	529.709	5686.88	175.173	102.716	30773	105.249	17.8551	2313.46	20092.4	0.249314	bdl	3.34965	1.05475	7153.07	11.4308	9.21414	84.6038	523.726	405.263	3107.36	758.122	4563.62	1817.83	588.137	1743.65	207.733	1117.27	222.422	607.73	80.2065	503.781	72.3853	0.504093	0.0319481	95.1494	0.068641	87.1789	163147	9444.21	132.567	1.63336	3.08895	614030
RX6765-4-5	14OCB361		42.7519	418.737	3627.38	157.481	148.932	23428.3	102.4	6.63105	1741.64	5442.87	0.120339	0.297474	5.47944	1.2174	6578.15	9.26479	9.14623	61.9986	264.964	317.884	2713.65	675.914	4140.6	1650.72	515.027	1597.18	191.503	1071.85	202.337	564.137	74.4539	458.65	63.8599	0.31773	0.0661094	82.9744	bdl	141.624	206927	11744.4	173.573	2.38969	2.63787	604954
RX6765-4-5	14OCB362		98.1979	859.246	5931.22	190.246	164.702	28125	99.4211	7.22438	2094.15	6145.1	7.02437	bdl	571.437	3.02687	7204.25	9.92734	9.14624	67.5246	366.791	367.065	3019.21	754.19	4478.42	1788.45	562.892	1742.26	218.256	1139.31	221.837	599.396	79.9915	491.461	66.9076	0.658137	bdl	82.8511	0.010241	206.384	176628	10243.2	278.316	2.27201	2.59586	619901
RX6765-4-5	14OCB363		80.8146	323.692	4024.94	101.729	47.2336	22263.1	108.774	14.1239	1673.57	13701.8	0.888458	0.165194	87.1104	1.08983	6731.62	9.95892	8.64289	67.0462	152.763	322.92	2624.96	681.074	4391.84	1711.04	527.581	1660.68	206.292	1135.58	212.091	607.301	76.5401	479.129	68.4766	0.464836	0.050384	78.5999	bdl	608.092	192249	11553.2	895.782	2.58442	2.77987	607981
RX6765-4-5	14OCB368		68.7562	287.949	2342.6	80.1779	53.4483	23298.2	85.0852	4.74848	1523.54	13974.8	207.308	3.02578	10010.7	4.7598	7224.23	9.51567	8.24115	52.8691	203.693	313.921	2706.21	704.808	4266.44	1707.51	572.614	1736.86	205.557	1145.11	216.211	591.806	79.561	488.139	66.4064	0.827752	0.0289945	77.2493	0.056273	138.659	188615	10961.2	177.709	2.70011	2.4873	603139
RX6765-4-5	14OCB369		32.9121	377.963	3920.42	146.209	63.1391	27264.4	110.467	5.95837	2031.08	14137.3	273.946	2.95853	5419.43	2.81516	7598.34	11.5921	10.2305	60.1599	339.403	375.157	3192.86	751.044	4608.96	1926.5	590.94	1876.75	230.872	1202.48	223.697	643.013	87.7618	515.482	70.3814	0.441107	0.0770275	76.7238	0.0480264	501.044	156877	9296.06	665.728	4.31951	3.78858	628000
RX6765-4-5	14OCB370		70.6203	418.112	3595.54	172.493	54.9769	26019.8	87.1447	6.21494	1871.94	10809.3	62.6087	1.18022	3369.58	1.28506	7519.81	10.3499	9.35568	61.0979	326.412	358.09	2953.83	759.409	4406.13	1778.61	567.657	1720.31	211.857	1135.6	223.641	637.046	81.3693	509.599	66.5517	0.530038	0.0713116	75.4906	bdl	137.238	164116	9413.11	163.225	1.75396	3.33019	631754
RX6765-4-5	14OCB371		651.801	1441.34	7947.75	147.589	830.522	24880.5	94.4557	7.03162	2356.34	7620.88	0.293116	0.255083	3.97489	2.88394	6974.23	9.95248	8.58077	73.0569	235.055	340.52	2923.03	728.575	4541.54	1749.08	579.114	1748.3	209.418	1080.29	210.047	590.365	77.5548	472.74	67.2968	0.503922	0.0297051	94.1258	0.0871719	123.145	182204	10451.1	157.299	2.00973	3.07268	611472
RX6765-4-5	14OCB372		23.7165	233.272	3017.91	164.71	50.9895	25360.2	104.103	6.22531	1869.92	12120.6	338.717	4.20712	7977.97	4.70698	7058.69	9.67136	8.81941	60.4679	259.117	334.668	2983.7	715.511	4477.68	1759.95	571.353	1793.06	211.301	1175.66	219.217	619.737	82.8965	503.377	68.1817	0.449144	0.0734413	82.1379	0.0367854	150.82	190925	11270.2	194.532	3.51781	2.10088	600168
RX6765-4-5	14OCB373		157.295	661.667	4081.05	163.484	65.6258	25126.1	87.6464	6.20556	1932.23	4209.28	5.29842	0.482354	542.715	2.53978	6868.25	9.57078	8.32394	64.0178	286.965	342.159	2876.41	688.114	4313.03	1778.55	540.966	1658.75	202.047	1104.67	214.75	573.898	77.4163	459.667	66.3132	0.387038	0.0401227	87.0616	bdl	142.43	208130	11759.8	178.153	2.50953	1.42165	600070
RX6765-4-5	14OCB374		172.486	1052.95	5003.75	172.448	197.731	24943.1	99.3312	5.46891	1796.13	6490.75	1.0357	bdl	5.13833	2.67814	6789.84	9.55232	8.27903	61.6218	310.906	347.029	2802.06	713.441	4324.18	1752.82	582.315	1659.9	207.564	1108.66	209.471	594.43	79.6387	504.021	67.0325	0.345624	0.0467639	87.5143	bdl	250.495	205764	12041.8	383.088	2.4733	1.48796	597283
RX6765-4-5	14OCB375		1493.44	3150.99	11222.2	275.777	103.503	25674.8	102.668	8.92929	2694.68	13629.6	14.1319	3.49989	3.73431	6.05586	7195.81	9.2203	9.01368	82.9427	168.712	390.501	2994.66	746.709	4467.24	1825.24	569.875	1724.74	218.233	1157.48	223.941	623.431	79.4448	491.346	65.0576	0.321048	0.0302928	93.4473	bdl	138.178	181345	10221	179.504	2.10241	1.31351	593295
RX6765-4-5	14OCB376		414.403	1021.34	4333.73	119.219	48.5558	23835.5	81.0537	5.59941	1817.98	6334.38	9.1491	2.4709	3.94573	5.51073	6811.22	9.36924	9.33871	66.3334	183.268	316.261	2782.82	695.129	4351.55	1713.54	540.047	1698.15	197.119	1069.58	212.235	586.028	75.1895	463.646	66.6298	0.371248	0.0665359	86.5984	bdl	130.148	224868	12888.9	196.072	2.26314	1.40155	581687
RX6765-4-5	14OCB377		99.7794	669.902	4266.71	127.354	142.462	23729.7	82.1792	6.47308	1818.18	5191.34	0.976212	0.296991	5.04907	1.9662	6436.87	8.21877	8.93144	67.5261	297.672	323.977	2798.91	662.287	4131.53	1670.25	528.751	1623.66	191.256	1035.87	196.526	565.273	74.4349	452.424	64.1445	0.374325	0.0362331	86.1344	0.0647116	735.087	239151	14391.8	1170.56	2.85214	1.40434	568592
RX6765-4-5	14OCB378		17.4265	222.849	2773.94	121.93	46.5954	20929.6	88.8048	5.47905	1697.58	71447.5	1103.79	23.4896	46885.2	2.0263	5882.04	8.10413	7.56941	50.8201	190.192	280.577	2345.12	591.806	3710.71	1490.32	489.715	1461.04	170.359	894.47	178.516	477.323	64.6358	391.939	56.8387	0.523466	0.0532083	67.6194	0.157278	222.409	167119	9861.93	253.251	6.61343	1.23947	516107
RX6765-4-5	14OCB379		586.866	1213.11	5262.39	145.254	60.4519	23550.8	97.1825	6.64027	1771.22	6892.68	6.04753	1.20545	5.72255	3.68183	7032.26	8.85778	8.38256	66.3139	153.173	309.763	2650.69	691.555	4152.05	1713.35	547.866	1658.54	197.978	1074.87	211.695	579.677	76.7409	485.373	64.4505	0.438557	0.0689964	78.318	0.0486089	141.071	191629	11234.3	166.821	1.86477	1.4688	612308
RX6765-4-5	14OCB380		22.5638	151.652	1725.13	99.1802	41.5583	24663.2	86.0605	4.97526	1432.98	2039.38	0.0552879	bdl	4.64703	0.204353	6970.5	8.78825	8.44812	60.9703	117.744	292.146	2819.24	713.655	4320.41	1777.15	592.095	1708.38	202.974	1092.7	212.703	592.446	73.1585	470.359	65.6579	0.527772	0.00511019	82.2895	bdl	156.161	230316	13138.1	199.582	2.60449	1.77442	587806
RX6765-4-5	14OCB381		182.248	676.069	4280.62	168.926	79.2621	24376.6	106.787	8.11256	1935.16	9311.37	1.36296	bdl	9.9398	2.92105	6869.18	9.02293	10.5784	68.6418	268.824	344.038	2855.38	688.278	4313.04	1703.38	559.125	1670.82	200.087	1092.65	208.49	573.302	74.6507	496.718	65.2715	0.327907	0.11258	89.8269	0.0296123	185.196	212351	12060.4	273.419	2.81432	1.36458	590293
RX6765-7-9	14OCB382		39.5278	217.346	3077.53	114.967	54.4973	25163.1	85.0514	6.18517	1864.27	3269.73	0.23149	0.043849	6.30782	1.95227	6813.19	15.6966	8.16573	68.2481	218.159	314.604	2810.3	704.721	4260.24	1703.31	539.82	1680.67	203.008	1083.5	209.258	587.09	78.0754	474.354	65.4318	0.662874	0.0213988	88.4096	0.00537837	148.66	221238	12667.4	219.876	2.16955	4.64998	591746
RX6765-7-9	14OCB383		28.559	276.411	3036.23	128.526	85.4997	25610.6	97.4682	13.9542	1737.32	14012	0.359766	0.155319	5.8154	2.73372	6685.94	19.3943	10.5113	78.5201	236.528	316.926	2791.94	702.281	4263.75	1682.59	540.092	1662.46	190.929	1058.45	202.363	586.451	75.3051	469.965	66.6067	1.03197	0.0947474	87.2143	0.0435906	138.83	210700	12309.1	183.803	2.04781	6.45224	588309
RX6765-7-9	14OCB384		16.248	142.599	2647.86	115.581	35.4827	23222.2	101.948	6.32011	1615.96	3917.08	0.126324	0.345841	7.01216	1.68756	6625.73	15.7809	9.43843	67.2927	173.602	310.429	2758.9	679.809	4173.86	1713.91	544.895	1676.03	196.247	1055.02	200.283	574.615	74.2776	449.333	64.2071	0.527731	0.0184599	84.2429	bdl	140.603	229329	13084.4	204.711	2.55971	5.8805	587016
RX6765-7-9	14OCB385		9.16628	69.6321	1638.9	93.5455	22.1168	22565.9	75.2821	4.53616	1327.07	2873.92	16.6214	0.805048	1813.93	1.05226	6545.97	12.5839	7.90357	54.9435	106.054	277.772	2564.95	653.989	4133.62	1651.8	519.698	1600.64	187.066	1039.22	201.62	542.168	70.8737	452.822	60.1727	0.389945	0.0491097	74.5201	bdl	203.351	237195	13861.4	281.994	2.93781	3.87948	581977
RX6765-7-9	14OCB386		13.8637	138.378	1950.03	95.3306	42.4314	22927.1	91.7015	5.89447	1551.45	4408.41	22.5712	0.707499	2765.62	3.66838	6426.42	13.5235	8.42499	70.507	160.393	287.867	2689.23	650.874	3991.14	1680.35	544.841	1646.93	189.574	1061.36	200.44	538.361	72.6419	446.338	61.5512	0.338377	0.0283232	83.2202	0.0054465	194.901	240390	13964.9	274.059	2.94043	4.12201	574340
RX6765-7-9	14OCB387		11.437	115.882	1062.77	150.465	49.4134	22329.6	99.0012	6.80546	1332.89	16578	8.29202	0.30412	1076.14	0.450548	6343.12	12.5146	19.1296	61.8121	115.485	267.52	2552.89	635.949	3880.16	1544.27	511.84	1570.34	184.947	1019.48	198.614	522.002	68.7714	438.856	60.2207	0.509162	0.324666	80.7027	bdl	162.251	239624	13990.4	234.926	3.16861	4.08486	564993
RX6765-7-9	14OCB388		46.3414	514.044	3655.32	108.037	166.618	24987	97.2849	4.37227	1691.14	5597.49	63.3992	0.525725	4189.43	3.31407	6405.36	12.4658	8.11715	67.5319	228.237	301.726	2666.41	651.574	3899.6	1625.16	510.8	1611.36	189.263	1010.65	196.152	556.589	70.1665	447.891	57.8473	0.453984	0.0748316	80.2085	0.0919285	290.214	247994	14232.9	456.4	2.93625	3.31648	556970
RX6765-7-9	14OCB389		30.6573	240.466	1754.36	89.2171	121.352	21496.3	78.6074	5.53027	1356.28	32523.8	445.303	6.61017	30645.9	4.65303	6345.65	11.4777	8.53451	54.9432	150.001	283.798	2504.84	635.718	3851.72	1529.3	512.81	1594.28	174.262	1016.09	188.424	521.324	70.0781	416.753	58.1049	0.640094	0.0814227	74.9529	0.387432	145.335	212889	12662.9	212.831	7.51045	3.0978	538094
RX6765-7-9	14OCB390		20.6208	77.3579	1510.35	117.372	24.9036	20603.8	71.4301	5.08476	1362.82	11950.9	152.954	1.4674	11209.2	2.77657	6003.74	11.1113	7.97095	63.5776	79.6151	263.885	2466.31	619.117	3829.7	1551.78	501.053	1531.8	178.31	1002.7	183.9	523.459	66.3351	409.324	61.9491	0.267691	0.054488	76.7871	0.0394574	157.745	250294	14469.4	231.144	5.09306	3.48498	551040
RX6765-7-9	14OCB391		11.4622	81.3817	1426.63	125.212	27.8928	22394.7	90.9523	6.42375	1370.37	3101.31	7.94137	0.572739	850.127	0.474239	6492.98	12.4598	9.67463	64.5523	104.735	272.375	2576.61	663.912	4133.21	1596.77	526.962	1687.28	194.69	1032.8	196.042	553.14	73.1526	449.637	61.9792	0.69313	0.0461695	75.2603	0.0455898	179.267	241655	13968.6	263.561	2.77924	3.46136	578891
RX6765-7-9	14OCB392		28.3882	178.122	2085.41	110.938	94.7165	23768.5	93.8909	5.27712	1467.96	2378.96	0.895859	bdl	78.8849	0.991048	6683.78	11.7986	8.38985	59.984	138.061	295.969	2762.62	677.825	4147.89	1638.67	535.817	1649.68	195.352	1052.04	202.495	569.243	72.8326	469.63	66.1392	0.517746	0.0253761	84.1163	0.00982118	144.728	226315	13116	201.699	2.60121	3.41014	592273
RX6765-7-9	14OCB393		12.6514	79.3291	1462.98	131.895	27.0052	21547.7	79.4094	5.43258	1476.79	12632.9	118.151	0.998833	11996.9	0.221621	6589.84	13.5013	8.17476	64.9757	123.532	274.944	2567.35	639.99	4008.33	1543.41	507.465	1559.5	185.81	989.321	191.702	551.152	70.6859	441.054	59.8816	0.492208	0.067857	81.0925	0.0422518	175.738	238255	13899.8	223.511	3.94968	4.02379	558957
RX6765-7-9	14OCB394		9.05386	57.8825	1310.05	87.8885	29.4787	19912.7	90.7019	5.23166	1329.25	4360.97	35.1962	0.335129	3426.47	1.38033	6323.39	12.501	8.28502	66.6728	75.6739	267.824	2468.47	618.888	4002.26	1575.11	503.408	1579.82	188.163	1000.54	191.063	528.508	70.202	427.328	60.5551	0.36896	0.0293887	76.3969	bdl	181.386	242690	14014.7	211.807	3.49936	4.09065	577665
RX6765-7-9	14OCB395		12.5177	61.853	1567.15	89.897	23.2168	19036.3	81.413	4.63285	1304.54	10221.9	112.26	1.14564	10227.4	2.0577	5761.21	10.8609	8.58707	58.5624	64.6067	245.822	2445.26	609.129	3769.94	1521.9	488.217	1493.35	169.388	925.956	182.948	524.781	64.9758	399.977	56.9276	0.351443	0.0580213	74.011	0.0268786	190.095	240827	14344.6	277.271	5.38668	3.56613	565953
RX6765-7-9	14OCB396		10.6105	74.7146	1239.42	100.121	29.5682	20499.7	87.8162	5.66523	1304.66	7082.68	36.3172	0.253835	2844.85	0.190647	6291.57	13.1127	9.42475	61.9699	86.9007	261.413	2493.32	617.836	3763.42	1530.15	502.641	1481.23	180.457	995.354	195.593	527.576	70.5166	432.855	55.9455	0.404343	0.0333526	76.7475	bdl	210.247	229400	13423.4	281.604	2.92577	3.50551	587766
RX6765-7-9	14OCB397		44.5742	412.929	2989.06	109.525	124.082	22545.4	86.2161	5.63511	1551.22	16055.2	114.773	3.04016	12584.9	2.29952	6244.68	13.354	9.37045	55.9376	191.505	279.398	2559.37	635.396	3819.94	1579.74	513.942	1607.67	185.255	1024.91	194.96	524.166	71.3346	446.754	62.4202	0.588312	0.0483249	77.7923	bdl	170.023	218496	12810.3	260.816	5.19704	3.32077	569327
RX6765-7-9	14OCB398		14.8374	106.137	1702.43	138.143	42.3398	23081.4	73.89	6.17959	1420.18	3152.31	6.70843	0.606372	722.694	0.867735	6491.59	14.3816	8.21503	61.9142	119.558	281.56	2706.04	661.649	4174.28	1677.58	549.511	1655.87	198.614	1025.42	208.36	580.411	74.5657	459.738	66.2246	0.384357	0.0267871	78.9385	0.0599909	161.408	237292	13434.4	230.434	2.28401	4.04555	581853
RX6765-7-9	14OCB399		15.3923	212.202	3256.76	102.095	50.3281	26294.4	84.197	6.07484	1882.35	3013.53	0.047841	0.0800571	3.12016	1.61407	7411.28	15.1007	8.87639	66.5865	299.124	355.176	3001.64	748.981	4736.89	1855.61	613.572	1831.94	221.596	1182.76	228.663	652.349	84.357	498.769	69.7196	0.437434	0.0579332	79.3203	bdl	121.66	191537	11052.1	151.334	2.35589	6.61511	618087
RX6765-7-9	14OCB400		12.6098	132.496	1881.91	80.9163	37.0254	24984.6	103.025	4.88917	1545.5	4313.38	20.9272	0.0783665	2352.08	1.64272	6963.53	13.8712	9.24599	62.2823	171.977	302.357	2703.54	681.4	4259.9	1730.99	556.738	1678.51	205.96	1104.54	205.535	572.678	77.8091	470.004	68.1811	0.177221	0.0255525	77.1836	0.0260114	150.254	219670	12613.9	203.1	2.44698	4.93064	592459
RX6765-7-9	14OCB401		45.93	132.376	1854.9	152.174	39.8181	20547.1	89.5102	4.67142	1484.68	17328.1	215.643	1.7179	19372.5	1.33979	5670.29	11.2554	7.54865	63.4423	129.202	263.082	2375.24	604.521	3529.11	1448.41	475.508	1398.5	170.38	890.64	175.218	497.544	60.7629	391.665	53.5879	0.32307	0.0611336	76.4624	bdl	156.333	234093	13617.4	227.211	5.53206	3.46905	551635
RX6765-7-9	14OCB402		87.2613	346.768	2622	114.62	49.926	23835.7	98.4904	5.48814	1545.82	3747.65	4.02305	1.01296	254.214	3.52161	6682.9	12.3845	8.50245	67.0031	178.861	286.356	2690.29	671.071	4220.1	1640.42	528.128	1620.35	196.063	1045.19	206.192	571.323	73.8801	462.619	62.372	0.775174	0.040302	81.5387	0.00551734	125.269	233788	13621.9	204.718	2.62118	3.06078	581286
RX6765-7-9	14OCB403		22.8096	158.114	1885.07	86.5922	44.1687	22464.5	96.5677	4.97068	1385.9	2512.13	1.68625	bdl	133.392	0.830836	6674.02	12.1791	8.02771	62.0967	126.448	284.979	2704.9	660.34	4226.83	1617.39	539.711	1658.03	197.869	1017.26	208.547	583.936	75.6068	466.639	63.2921	0.565541	0.0408691	77.4931	bdl	134.982	221403	12935.7	203.617	2.35048	3.3092	599171
RX6765-7-9	14OCB404		12.1936	79.7994	1642.37	81.9772	32.507	21478.8	76.282	5.01031	1384.52	2448.95	9.81139	bdl	918.471	0.789416	6708.99	12.1549	8.59334	62.1885	99.5421	282.281	2631.25	646.615	4047.9	1678.04	536.848	1652.4	199.101	1036.25	197.85	565.583	73.6693	455.371	62.8336	0.787737	0.0368168	81.0022	bdl	149.716	249572	14486.3	226.356	2.90955	3.56619	572212
RX6765-7-9	14OCB405		18.2792	106.927	1661	35.1795	26.9081	20411	84.6455	5.3642	1366.52	5337.7	24.1504	0.507278	2747.69	2.42354	6122.13	11.0867	7.88203	57.464	98.5354	257.397	2535.8	605.217	3784.14	1537.45	493.48	1510.59	173.87	976.893	184.814	520.328	68.2379	427.026	60.1128	0.217496	0.0403661	79.9463	0.0166314	177.446	245958	14131.9	250.871	3.20208	3.39461	573214
RX6765-7-9	14OCB406		16.3708	79.6101	1416.9	69.5453	36.7152	21276	83.7955	4.7696	1338.09	7104.07	58.1656	0.301498	5722.71	1.3936	6315.67	12.1179	7.96696	67.6527	82.7842	265.815	2570.83	652.826	3997.89	1537.64	502.692	1547.12	187.428	990.89	194.484	572.278	68.4357	449.237	61.3384	0.67035	0.0735738	77.7542	0.0487702	187.646	254563	14284	245.801	4.25696	3.14249	558050
RX6765-7-9	14OCB407		11.8432	69.721	1211.87	81.9012	28.3146	20321.2	93.1518	4.89029	1310.91	10878.8	77.8176	1.65174	9754.18	2.47634	6141.17	9.78479	7.3183	62.1454	85.3034	256.556	2505.72	613.146	3803.79	1510.97	503.023	1546.41	186.258	954.108	193.994	529.477	68.4966	428.089	58.6859	0.480991	0.0650526	72.6715	0.0210667	194.082	242848	14238.7	253.577	3.42799	3.18416	562231
RX6765-7-9	14OCB408		10.3102	58.8043	1270.64	60.9594	23.4261	20506	80.5608	4.62402	1344.67	5675.44	57.3102	0.675632	6152.3	2.60807	6425.58	11.1873	7.87043	57.7889	79.0822	258.647	2587.47	632.905	4025.34	1532.33	509.161	1602.94	188.788	1031.1	190.746	549.114	71.58	433.683	61.8496	0.303328	0.0638222	81.3492	0.10717	163.303	244869	14451.7	236.139	4.57167	3.89865	569567
RX6765-7-9	14OCB409		11.1707	91.194	1430.43	113.723	55.1139	20437.9	82.3255	5.11107	1366.03	8243.97	88.5164	1.42907	7846.8	3.16798	6056.66	10.2963	7.64525	65.4229	108.566	251.239	2469.75	610.548	3741.52	1508.73	480.297	1463.53	187.204	972.928	182.014	507.261	64.6846	440.572	58.5244	0.208221	0.0845015	77.635	0.0582754	164.599	243855	14319.8	253.299	3.61305	4.61826	566194
RX6765-7-9	14OCB410		10.7756	54.6253	1421.13	94.7359	24.1967	21173.1	80.6192	4.56673	1316.74	4909.93	51.2748	0.344476	4173.85	2.31366	6565.51	12.2905	7.76418	63.2039	75.3294	276.865	2620.07	651.112	4035.47	1630	525.408	1628.86	190.498	1026.9	199.663	550.564	72.4006	459.69	64.5234	0.553394	0.0459718	77.6509	0.048967	188.448	253933	14778.1	238.073	3.66452	3.45927	562219
RX6765-7-9	14OCB411		26.154	214.506	1719.21	99.8681	170.071	21641.6	89.4803	5.54714	1395.42	3090.81	4.9628	bdl	845.457	2.38941	6609.52	13.1952	8.22453	66.0196	107.02	269.64	2538.26	636.425	3931.27	1541.31	502.9	1560.04	182.733	979.96	195.22	533.868	68.8268	445.432	62.046	0.321174	0.0539074	80.0695	0.0106447	166.888	238926	13689.9	220.983	2.71232	4.19544	582275
RX6765-15-16	14OCB418		24.3238	211.942	2653.56	408.432	62.3244	33456.9	137.213	7.45204	2582.36	3817.75	0.122493	bdl	4.09576	1.27631	7170.05	22.7371	17.6991	73.7485	491.662	472.143	3497.33	783.111	4662.84	1841.82	601.059	1865.8	216.74	1119.89	217.482	616.902	79.5566	526.683	67.6077	1.2576	0.0822197	99.5637	0.011717	83.2923	165538	9454.08	127.795	1.27474	5.30912	633629
RX6765-15-16	14OCB420		24.9639	215.915	3923.89	413.769	66.4616	31659.7	125.948	6.81878	2503.38	3700.61	0.10196	bdl	5.24481	1.6664	7161.63	22.4647	16.49	74.5467	492.539	491.206	3509.75	776.439	4656.14	1883.34	597.367	1822.21	212.984	1134.55	222.376	593.02	80.3614	484.313	67.101	1.02865	0.060325	96.5989	bdl	86.6981	164365	9091.88	125.33	1.43415	5.641	635187
RX6765-15-16	14OCB421		22.7074	222.361	3817.97	372.97	68.4008	27998.5	125.542	5.85485	2403.03	3427.29	0.130615	0.161472	2.50618	0.536051	7319.63	22.4126	17.9814	83.3042	439.975	475.613	3499.84	778.369	4551.58	1828.49	588.196	1766.36	218.182	1145.46	219.731	595.003	76.4568	490.558	68.6556	0.894088	0.062065	97.3747	bdl	92.1647	168336	9805.03	148.504	1.88512	5.28248	636060
RX6765-15-16	14OCB422		22.4907	215.006	4165.14	423.924	65.5524	32164.5	126.131	7.07435	2663.89	6359.94	106.493	6.08475	3393.91	1.03534	7077.17	23.3987	15.7689	76.6373	454.102	491.856	3415.88	778.634	4621.38	1788.72	580.678	1749.41	215.009	1100.35	213.407	590.231	79.2821	484.853	64.8075	0.909107	0.110534	99.3622	bdl	1809.02	178318	12180.8	2703.23	13.6858	5.44381	606907
RX6765-15-16	14OCB423		22.1097	217.072	3861.57	470.137	58.2383	30153.7	128.278	5.86633	2574.52	3931.51	0.0801104	bdl	1.79934	0.172984	7088.13	21.3598	16.0121	73.8303	457.737	483.263	3343.75	785.999	4569.22	1835.37	590.829	1725.27	202.287	1149.8	209.229	606.666	76.9912	488.051	65.8436	0.968854	0.131198	100.355	0.0385866	72.331	166245	9421.68	131.869	1.81364	4.86251	635133
RX6765-15-16	14OCB424		26.6209	243.056	4402.37	475.556	88.1013	31703	134.717	6.60038	2599.46	3833.52	bdl	bdl	1.48625	1.24224	7426.72	23.1664	16.9842	89.7296	558.56	495.396	3468.2	787.458	4824.26	1896.08	614.024	1855.31	217.67	1185.23	223.746	621.606	82.0081	508.597	68.3356	0.994132	0.0340222	105.201	bdl	77.3809	163242	9130.79	120.724	1.29885	5.43132	634082
RX6765-15-16	14OCB425		26.7573	237.127	4105.37	405.014	67.7821	32327.9	122.845	6.07849	2594.11	3793.59	0.245754	0.340636	7.50604	4.073	7472.64	25.2247	16.8008	81.8166	481.168	499.603	3564.57	808.355	4773.81	1879.88	609.767	1800.27	222.046	1164.08	222.882	616.926	89.7383	502.499	67.3646	1.15692	0.0971437	101.795	0.0136082	118.562	161915	9055.73	165.779	1.15615	5.52333	635416
RX6765-15-16	14OCB426		25.9019	241.245	4432.3	436.78	88.2174	31872.9	128.792	6.71788	2617.84	3825.37	0.0328108	0.0991751	0.785396	0.485587	7351.04	23.1393	16.678	84.631	557.712	494.007	3600.71	825.829	5063.05	1911.63	625.603	1847.14	221.312	1216.95	227.744	627.671	84.8592	518.692	68.0808	1.08787	0.0667996	105.614	0.0935579	86.5048	163877	9432.64	122.827	1.45191	5.23854	632584
RX6765-15-16	14OCB427		18.4002	188.768	3432.61	303.469	64.5303	30053.9	133.027	5.2192	2205.25	3265.78	0.0102886	bdl	2.98826	bdl	7226.36	23.2032	16.3271	71.8892	389.426	463.199	3476.68	766.858	4668.83	1890.07	601.472	1795.81	215.646	1187.32	226.739	623.868	80.3831	519.92	68.356	0.749091	0.0492809	98.2078	0.0644392	113.158	175162	9972.6	133.877	1.57503	5.47469	628111
RX6765-15-16	14OCB428		57.0341	217.144	4304.67	347.647	62.8445	28181.6	134.967	6.46129	2408.35	3939.24	0.125773	0.0527667	2.72781	1.33098	7043.08	23.3472	17.0038	79.3628	382.897	450.518	3287.61	783.551	4473.01	1824.1	569.984	1808.65	204.934	1125.59	215.079	585.961	76.8029	469.85	66.8178	0.710445	0.0745133	98.439	bdl	131.991	181064	10192.4	176.577	1.53987	5.18535	622492
RX6765-15-16	14OCB429		27.5117	256.979	4412.59	515.421	72.3608	31836.3	132.655	6.73244	2677.43	3950.27	0.07339	bdl	1.32577	1.78109	7464.69	23.2442	17.7997	85.5996	571.083	509.656	3638.2	813.551	4826.53	1911.01	605.217	1894.59	223.475	1202.34	226.705	631.333	86.4536	506.801	69.691	1.08824	0.0207953	99.3576	bdl	76.5536	150797	8681.52	107.304	0.903656	5.88364	645480
RX6765-15-16	14OCB430		20.2587	195.675	3575.31	326.488	68.9474	31169.9	105.558	6.13733	2297.07	3549.09	0.00425388	0.404502	1.36907	1.87172	7660.97	24.9028	17.0244	74.4172	425.051	481.105	3517.46	793.579	4880.42	1841.61	597.114	1872.66	214.458	1175.83	228.229	634.303	81.4913	513.256	72.7591	1.10103	0.0495888	93.7985	bdl	81.5382	156966	8887.81	120.164	1.38988	6.46669	643481
RX6765-15-16	14OCB431		23.5248	221.132	4379.51	387.237	77.8817	31630.9	124.981	7.50094	2505.04	3749.79	0.0724993	bdl	1.98777	1.20192	7287.41	24.537	18.395	86.5965	514.99	476.545	3396.17	795.694	4767.29	1824.96	640.114	1792.15	216.267	1158.44	225.087	615.074	83.7309	504.706	67.3405	1.4009	0.0821625	100.771	bdl	97.8568	166266	9254.64	119.697	1.53261	5.90001	632158
RX6765-15-16	14OCB432		22.004	181.612	3687.33	341.044	56.2622	30041.9	133.621	5.18424	2218.62	3211.06	0.149671	0.135161	1.82993	1.85988	7467.83	26.0419	17.9967	73.0347	411.309	491.737	3477.3	817.223	4981.99	1928.53	632.133	1982.3	225.621	1199.98	234.933	633.055	84.2818	543.529	69.9332	1.21575	0.0299688	90.0559	0.0339055	407.709	164517	9641.05	668.466	1.62677	6.92958	636250
RX6765-15-16	14OCB433		24.8691	218.944	4144.43	412.962	85.3141	27496.6	141.844	6.16843	2256.79	3501.2	0.00859464	0.0453597	1.18451	bdl	7465.85	24.7765	16.3657	87.9444	530.349	461.163	3401.44	786.804	4764.32	1928.76	604.711	1831.23	218.663	1165.85	230.604	610.779	79.2291	487.644	65.9054	0.89609	0.0445215	101.721	0.0113733	111.006	170852	9642.8	127.786	1.4812	5.89903	633183
RX6765-15-16	14OCB434		23.079	235.608	4080.74	437.844	73.2176	30813.5	145.334	6.52611	2642.74	4078.84	bdl	0.172962	2.32049	1.81706	7505.05	24.7447	19.3779	90.8876	542.155	503.36	3725.4	807.558	4919.96	1918.86	626.304	1859.93	230.062	1221.42	231.415	626.503	81.4206	505.502	67.0793	1.25564	0.0742923	104.453	bdl	111.794	165165	9580.88	129.005	1.34361	6.00333	632643
RX6765-15-16	14OCB435		175.095	631.673	4759.28	409.41	74.5027	28225.3	113.734	6.81128	2377.31	5472.64	5.29353	2.72272	5.49933	2.88732	6795.05	23.5702	15.5856	65.4892	524.69	439.152	3090.42	711.558	4274.57	1642.31	541.219	1623.34	197.72	1085.08	216.175	595.093	74.7624	468.776	64.7058	1.03958	0.0583572	93.1402	bdl	148.473	170242	9741.91	190.594	1.76978	5.04552	630494
RX6765-15-16	14OCB436		26.4954	257.519	4488.37	441.157	69.9544	33121	120.479	6.34464	2686.5	3987.14	0.104423	bdl	6.01245	2.11313	7505.82	26.2388	17.7158	86.7606	548.682	491.855	3584.81	814.11	4888.8	1976.75	632.901	1884.34	220.124	1269.53	233.797	648.774	86.562	528.245	70.4325	1.17537	0.0749525	103.883	0.0958991	170.814	159770	9118.17	214.331	1.50832	6.52031	634511
RX6765-15-16	14OCB437		137.249	449.979	3437.06	283.34	40.4831	23046.4	105.464	5.98798	1894.86	5174.74	12.2504	1.4129	1945.82	9.61767	6210.94	24.5754	13.8036	58.7699	277.811	368.474	2848.8	658.126	4008.38	1579.45	515.168	1619.15	185.922	994.415	193.864	533.161	68.3021	442.158	58.8836	1.24863	0.0716472	79.8524	0.0827065	838.329	204298	12578	1254.59	2.33294	5.51698	604002
RX6765-15-16	14OCB438		20.2962	188.145	3481.8	331.524	52.8115	31348.2	131.026	7.15397	2249.32	3343.19	0.00179368	0.00945116	2.93245	2.00528	7332.69	25.6146	16.691	73.5864	391.378	471.672	3484.22	804.504	4673.47	1875.85	603.88	1797.73	212.99	1196.43	219.377	626.078	81.0519	477.179	70.5211	0.949052	0.0853412	92.0832	0.00236419	174.69	163748	9344.81	308.112	1.36294	6.23688	637309
RX6765-15-16	14OCB439		968.668	1401.84	9774.41	644.79	148.706	24820.2	127.606	8.28479	2656.24	7704.2	2.30794	0.521653	127.988	18.6403	6174.6	22.4744	15.7577	80.969	260.752	480.291	3194.88	687.329	4213.63	1662.09	527.62	1553.96	189.35	1053.68	197.703	526.251	67.2708	439.947	61.6008	0.822845	0.0585295	94.0902	bdl	3222.96	191694	14764.3	5098.97	1.62661	5.2472	587308
RX6765-15-16	14OCB440		21.1819	163.082	2879.57	275.866	46.186	25815.7	112.358	4.52761	1886.26	5486.05	83.8546	2.78357	2270.51	1.84297	6509.87	17.1961	15.6607	70.446	269.257	341.981	2861.99	700.391	4288.1	1704.68	525.683	1639.84	196.364	1054.57	203.511	563.49	71.9556	458.653	62.0608	0.762967	0.0760329	81.4939	0.102138	124.104	203786	11755.4	177.341	2.14166	2.39899	603495
RX6765-15-16	14OCB441		21.7972	176.395	2798.01	299.005	32.6165	21072.3	100.495	5.22572	1726.93	73617.8	1940.04	72.0034	75123.3	7.36443	5634.27	14.7997	14.1749	50.6916	183.717	320.53	2473.55	587.977	3499.01	1454.37	459.261	1390.25	160.578	908.67	181.11	486.023	64.2095	384.705	50.6657	0.600039	0.073493	65.3704	0.347384	563.212	157812	9464.77	796.969	11.4977	2.11099	489494
RX6765-15-16	14OCB442		235.283	515.646	6986.76	588.936	53.8252	25447.4	122.568	7.96299	2233.14	3978.35	0.186331	0.042632	6.57957	3.79313	6865.45	18.2939	17.6654	87.8947	304.549	457.54	3361.43	814.728	4455.92	1768.6	574.983	1753.42	218.914	1172.42	223.266	615.447	84.0992	508.166	68.3037	0.670115	0.0301475	96.6451	bdl	879.276	166601	10289.5	1342.43	2.24667	2.54529	631693
RX6765-15-16	14OCB443		138.953	390.351	4607.64	386.207	58.9619	26542	119.978	6.03258	2237.77	4376	0.247281	bdl	5.46707	1.54164	6673.79	17.4496	15.88	71.7649	303.069	415.293	3180.76	731.463	4354.57	1728.09	550.181	1656.98	206.061	1086.64	210.884	578.56	76.1141	478.206	63.8583	1.16535	0.0124158	93.2766	bdl	206.975	184771	10869.5	283.698	1.79037	2.48478	619950
RX6765-15-16	14OCB444		49.535	206.937	3101.39	372.623	48.799	26591.6	120.175	6.14502	2142.61	3398.77	0.158795	0.15799	7.70481	bdl	6643.22	18.9928	16.8766	69.6443	337.19	376.921	3106.13	724.794	4364.39	1758.29	551.854	1676.73	199.619	1115.98	206.104	562.237	75.6552	479.202	64.7871	1.08051	0.0958141	86.8644	0.0647453	130.949	183755	10429.1	201.921	2.00215	3.38491	626143
RX6765-15-16	14OCB445		22.7075	182.983	3506.42	290.99	49.1435	27225.7	123.585	4.78867	2167.38	3409.98	0.128807	bdl	5.77408	1.94002	6764.02	16.8466	15.361	71.7053	353.845	378.678	3088.19	697.666	4436.86	1689.51	574.473	1694.09	195.514	1099.38	212.206	568.001	75.5029	462.87	65.2311	0.904512	0.0486192	87.9172	0.0647217	107.282	194426	11098.5	166.016	2.2353	2.31525	613955
RX6765-15-16	14OCB446		704.853	894.739	7746.42	616.59	100.468	28043.2	125.594	8.34248	2265.18	5478.03	5.16946	0.508427	11.2994	2.14453	7096.39	19.3638	16.3552	90.0052	208.131	486.36	3333.59	726.289	4517.68	1771.18	566.415	1756.02	212.42	1175.63	233.246	597.731	85.23	502.712	68.9339	0.726193	0.0571519	95.3457	bdl	503.931	178168	10829	793.748	2.34236	3.51251	612952
RX6765-15-16	14OCB447		277.513	858.773	9000.34	646.271	105.543	31330.5	133.861	9.59759	3213.91	6791.99	0.370204	0.178102	3.8121	1.29165	7405.34	24.0229	17.9113	89.038	290.744	526.895	3725.64	817.969	4881.71	1931.64	625.697	1833.73	230.955	1201.84	240.839	649.276	86.8899	512.646	73.1288	1.14969	0.103746	106.405	bdl	136.905	127184	7452.93	185.064	1.49959	4.81977	655177
RX6765-right of 13	14OCB448		11.5531	96.6849	2016.76	184.964	33.3798	23000.3	115.861	4.39936	1455.45	7994.85	130.847	2.94595	10396.7	4.64953	6668.91	13.4483	12.8963	54.9435	187.984	297.36	2661.9	663.147	3985.37	1615.12	530.512	1593.55	199.101	1057.62	197.664	551.154	68.8509	440.397	60.6955	0.67863	0.0723466	71.1595	bdl	4319.77	226328	17247	5961.8	9.38294	0.791837	561826
RX6765-right of 13	14OCB449		21.387	195.417	3014.69	303.599	66.1079	27152.4	119.1	7.35442	1995.46	3388.17	9.5099	bdl	683.093	1.60337	7250.97	17.1034	18.0946	73.085	425.316	374.318	3094.84	749.791	4568.4	1798.86	588.026	1751.12	206.592	1122.35	234.011	605.81	79.1558	488.323	69.2592	0.973204	0.0803984	95.0339	bdl	113.196	191999	10910.5	157.878	2.06835	1.05142	615735
RX6765-right of 13	14OCB450		13.2662	59.9133	1067.93	129.653	23.4708	24258.5	106.137	4.92032	1355.95	1757.8	0.24956	bdl	31.6077	6.23717	6527.51	15.9142	14.4461	63.9671	82.5477	309.587	2770.13	688.468	4280.53	1658.25	537.997	1607.48	191.713	1045.43	196.794	576.89	94.5612	477.59	62.969	0.662636	0.1435	74.7251	bdl	183.95	232339	13521.1	247.372	2.60608	0.952822	588653
RX6765-right of 13	14OCB451		12.9577	87.2719	1733.45	186.909	42.2682	25296.9	106.628	5.40466	1583.96	2368.19	0.0351436	bdl	4.16318	bdl	6788.93	15.5617	15.8873	70.9748	212.575	338.286	2913.45	717.225	4315.25	1682.05	552.659	1734.58	198.801	1095.67	200.315	572.654	75.1851	454.824	62.5532	0.955248	0.0618829	87.0053	0.0101885	198.709	217117	12462.7	278.811	2.08018	1.00889	599488
RX6765-right of 13	14OCB452		7.64091	44.3622	1102.81	123.511	17.7451	21291.5	107.203	4.49776	1241.97	1491.47	0.143143	bdl	10.1521	1.34888	6280.99	14.3097	14.1452	56.016	67.4109	277.054	2533.05	650.388	3998.84	1525.07	499.351	1541.89	187.882	1015.79	189.112	539.623	69.3465	441.168	61.0448	0.641363	0.0997078	73.1358	bdl	167.772	239169	13887	213.839	2.4708	0.827062	587315
RX6765-right of 13	14OCB453		8.33838	49.502	1320.04	133.49	24.6227	21346.3	103.258	5.09378	1232.91	1551.27	0.639069	0.13798	125.531	0.169633	6491.36	13.193	13.7314	61.8042	86.0789	265.711	2603.77	644.829	3988.18	1532.74	493.925	1597.59	189.161	996.328	190.734	539.531	72.9153	451.626	58.6144	1.00082	0.0534886	71.3439	0.044068	188.376	239479	14024.7	251.355	2.47626	1.08377	585773
RX6765-right of 13	14OCB454		9.96824	56.3762	1469.85	104.381	22.9102	22819.7	95.8868	4.84918	1326.6	6698.15	51.1227	0.956723	7727.29	0.312102	6429.4	14.7903	13.5469	59.9488	113.989	277.562	2642.79	651.594	4042.35	1601.72	517.439	1583.23	191.073	998.934	198.402	541.126	68.1422	441.399	60.8717	0.892149	0.0590189	72.3963	0.0824136	180.554	233293	13185.3	236.388	3.05881	1.07127	575230
RX6765-right of 13	14OCB455		9.4568	49.0621	1093.47	91.8776	15.1754	23671.7	91.2509	4.74507	1285.36	1476.39	bdl	bdl	7.0248	1.10484	6340.78	13.4394	14.1396	60.5633	60.8753	286.11	2603.91	649.42	4007.25	1563.9	501.507	1573.17	188.748	990.767	198.984	531.079	69.638	430.439	62.2069	0.849891	0.0862329	79.366	bdl	157.135	247331	14092.8	218.416	2.17838	0.92757	576298
RX6765-right of 13	14OCB456		13.2606	72.6267	1515.6	165.456	22.6267	27372.4	106.88	5.25173	1697.37	2242.2	0.00848279	bdl	3.2704	1.44843	6762.45	16.2071	15.774	68.7309	140.335	351.993	2990.04	718.976	4328.27	1688.53	550.829	1699.83	198.114	1071.82	205.008	567.453	74.3904	476.297	62.1022	0.976725	0.0754252	89.169	0.0551156	120.879	215429	12168.7	182.73	1.91116	1.31248	599527
RX6765-right of 13	14OCB457		11.6156	65.8019	2082.66	108.623	28.4285	25681.5	104.496	5.79208	1549.72	2301.97	0.0355972	0.0414258	4.49289	1.17212	6442.42	14.3146	14.9883	67.9271	135.336	324.367	2895.04	685.7	4236.31	1656.79	538.882	1684.33	192.697	1025.8	206.452	548.069	74.0384	452.278	62.1014	0.748203	0.0268542	84.6645	0.0205427	272.595	228610	13070.5	405.483	1.96197	1.14526	587815
RX6765-right of 13	14OCB458		14.6985	83.6071	1306.69	136.367	25.0623	21109.9	105.775	4.92078	1400.91	1773.11	0.449037	bdl	10.115	2.16273	6660.65	15.2895	13.9181	60.4564	124.187	289.905	2704.79	648.387	4178.59	1569.46	513.789	1564.46	187.526	1052.46	201.877	548.205	71.7286	454.38	63.263	0.852612	0.0640832	83.0749	0.020994	238.952	242508	14321.3	333.671	3.40643	1.11405	581702
RX6765-right of 13	14OCB459		13.3721	124.114	2501.79	190.859	46.8263	25547.2	114.541	5.58496	1713.87	2715.52	4.51846	0.197325	16.2793	1.51091	6775.63	16.9395	15.694	67.4932	213.544	357.983	2903.83	697.553	4191.39	1666.64	536.074	1692.22	195.174	1072.57	212.094	573.015	72.2674	461.133	64.5374	1.06392	0.0406297	86.2597	0.0353026	136.877	217490	12440.3	199.257	2.48809	1.43147	597078
RX6765-right of 13	14OCB460		18.6588	113.58	2241.42	253.647	36.7421	22606.4	111.936	4.85961	1546.67	3320.69	18.593	0.887271	1988.32	2.96411	6574.62	17.2044	14.9362	65.1391	196.193	303.508	2770.19	674.787	4124.97	1658.08	538.396	1620.09	191.405	1056.2	205.128	549.301	71.3319	457.081	62.2288	0.560494	0.054822	80.1992	0.00261536	180.75	223123	12737.8	234.12	2.90631	1.47748	593304
RX6765-right of 13	14OCB461		9.44963	66.4051	1559.05	147.839	29.9329	20925.9	99.4197	4.53225	1305.87	2448.9	8.24305	0.181023	321.346	1.95601	6381.53	15.7521	15.2948	61.1662	133.689	278.952	2531.48	647.077	3888.7	1600.16	513.498	1523.03	186.086	1017.71	191.919	529.593	69.3363	424.229	61.1893	0.996507	0.0870169	77.3112	0.00995577	315.751	250458	14282.3	479.675	2.74142	1.30479	573565
RX6765-right of 13	14OCB462		23.9998	191.553	3349.98	228.336	58.2411	29308	107.823	5.74779	1846.87	2865.41	0.0640753	bdl	6.61436	1.28892	7181.65	18.1427	16.0563	76.3368	446.455	367.217	3031.65	719.28	4286.44	1745.88	569.268	1752.36	210.053	1146.25	220.185	609.148	79.8837	498.554	66.1849	1.00889	0.0504811	90.7215	bdl	132.292	193272	11007.6	185.33	1.85871	1.70364	613368
RX6765-right of 13	14OCB463		12.5483	90.0343	2130.79	240.295	26.3732	23698.5	118.055	4.92708	1503.14	3021.93	6.28883	bdl	433.899	0.130966	6434.5	16.3789	14.6628	62.6332	193.505	303.894	2754.49	670.723	4045.53	1641.67	520.863	1567.35	202.028	1022.8	199.664	534.898	71.8582	450.616	60.6811	0.644492	0.103913	82.404	bdl	230.432	228514	13428.3	329.984	2.21189	1.82434	588890
RX6765-right of 13	14OCB469		14.1438	198.93	1438.57	230.998	50.9455	22559.8	173.413	9.08621	1513.13	20723	65.3141	0.766464	4975.44	1.52999	6463.39	16.3505	21.6937	65.6759	193.19	315.024	2605.29	641.908	3775.75	1528.97	497.946	1558.07	186.541	993.186	195.762	515.695	65.5535	422.111	59.7833	0.799143	0.594469	73.7908	0.0307172	166.382	216441	12344.7	207.758	2.76353	1.66511	577269
RX6765-right of 13	14OCB470		12.7477	101.058	1740.41	171.04	43.1149	21553.4	109.702	5.21605	1577.69	19866	430.527	4.53992	24923.3	2.70386	6093.57	16.172	13.8536	60.6033	196.971	297.067	2612.23	621.428	3760.66	1590.94	487.744	1567.02	188.093	993.149	191.959	530.303	68.0454	431.65	59.1166	0.634117	0.0362262	76.5719	0.22236	222.323	214728	12476.4	296.182	5.99709	1.61291	558664
RX6765-right of 13	14OCB471		12.2235	115.584	2057.02	171.386	43.3176	21081.9	101.904	5.1462	1577.28	10700.8	170.869	2.90513	10631.7	3.75825	6122.63	15.9596	13.2715	65.982	176.228	289.864	2579.9	638.805	3950.99	1493.18	486.131	1504.5	174.074	950.003	192.753	517.068	65.0602	424.708	58.9492	1.01835	0.110151	78.4857	0.131058	215.936	220008	12987.5	301.318	4.26334	1.77143	580804
RX6765-right of 13	14OCB472		16.9484	142.274	3059.57	230.296	43.4086	27472.3	106.121	6.00987	1781.71	3786.3	1.07371	bdl	142.868	1.71648	6600.74	15.8343	15.7547	72.9699	299.046	333.592	2873.66	686.128	4096.05	1656.26	522.136	1642.23	201.792	1080.14	197.82	536.285	69.3273	453.183	63.9128	0.857288	0.0835907	84.0222	0.0716241	221.175	203760	11769.3	333.998	1.72906	1.50916	605863
RX6765-right of 13	14OCB473		40.5393	194.202	2782.11	188.971	45.7649	25371.5	108.122	5.25537	1720.75	7533.33	72.7655	0.733121	7891.31	1.22058	6572.47	16.887	14.5621	66.7405	231.264	317.945	2805.46	691.932	4076.99	1571.59	525.027	1578.32	197.764	1073.24	195.93	546.134	71.9174	467.226	61.8818	1.0397	0.0773292	78.8475	0.0293278	158.462	212759	12199.3	223.199	3.52764	1.4124	587211
RX6765-right of 13	14OCB474		15.4051	115.671	1868.96	235.399	43.1272	22097	116.101	5.14604	1638.11	5740.52	81.3361	0.84963	5348.08	2.2694	6352.87	15.7294	15.4396	62.2	228.585	310.649	2618.24	648.873	3983.74	1651.74	505.418	1583.6	186.345	1009.55	189.894	539.77	70.5839	424.168	60.4549	0.885001	0.0807202	80.5654	0.020502	265.077	219115	12912.1	381.998	2.77919	1.64436	591890
RX6765-right of 13	14OCB475		87.3529	224.884	4736.34	386.377	84.052	28629.7	116.586	6.2762	2356.89	3632.32	0.203262	0.169468	4.94474	2.08513	6989.46	17.2788	15.4257	86.7223	216.634	421.682	3108.94	758.267	4565.38	1794.2	593.084	1758.77	209.55	1151.79	217.446	607.519	78.7656	489.929	69.4091	0.833789	0.0314328	91.0988	0.0778561	106.064	163605	9657	158.84	1.98516	1.63102	638938
RX6765-right of 13	14OCB476		18.9675	167.37	3159.5	281.61	69.375	26465.1	127.585	5.42183	1945.58	2755.78	0.147097	0.20412	45.7737	0.948702	6878.77	17.1842	15.1811	64.2333	306.471	366.534	3021.24	712.424	4485.16	1778.67	560.076	1658.94	200.234	1084.03	207.252	575.281	77.0013	476.976	63.7378	0.923919	0.0883354	86.5553	bdl	136.115	207875	12212.9	171.222	2.33454	1.67696	602640
RX6765-right of 13	14OCB477		30.1242	246.429	4311.59	527.221	99.3413	30094	132.731	6.58851	2393.8	3701.45	0.0466444	0.133415	4.01492	bdl	7332.73	17.0327	16.0884	73.2531	566.44	433.706	3177.02	747.35	4388.01	1743.79	578.271	1794.09	211.071	1152.51	220.898	594.361	76.0684	467.898	67.7475	0.765781	0.137462	96.644	bdl	100.389	174247	9801.49	142	1.7667	1.8475	626760
RX6765-right of 13	14OCB478		40.3117	274.439	3889.05	377.991	69.0261	29472.9	115.908	6.51301	2212.82	4194.98	0.0532093	bdl	4.36255	1.98072	7139.37	18.3728	16.2999	75.8302	405.552	418.51	3186.84	755.337	4519.95	1868.61	592.342	1775.04	217.678	1157.39	217.865	605.686	81.1241	487.426	68.059	0.768948	0.0650315	94.0382	0.029225	138.442	174816	10082.9	194.616	1.61866	2.90393	627373
RX6765-right of 13	14OCB480		19.8755	186.184	3633.5	377.428	56.4371	29738.8	117.066	6.11182	2217.44	3321.57	0.201552	bdl	4.79586	bdl	7447.58	18.6237	16.8026	73.5978	414.118	420.304	3211.23	780.829	4745.94	1897.65	602.673	1787.9	211.462	1151.95	221.108	601.811	77.9013	498.002	70.368	1.1404	0.0497504	91.0243	0.0170804	90.6732	182183	10424.7	144.317	1.73742	1.76853	620899
RX6765-right of 13	14OCB481		171.858	344.303	5035.48	477.376	70.2587	41522.7	106.346	6.83696	2845.14	4533.74	1.36323	0.212586	8.37222	3.34061	6741.23	15.348	15.5379	84.9912	218.858	419.535	3086.78	727.781	4329.2	1719.08	586.375	1710.63	207.451	1167.33	216.737	549.084	78.1972	484.411	64.6282	1.0923	0.094895	91.1878	0.114053	190.32	192931	11202.6	239.659	4.87691	1.22468	591580
RX6765-right of 4-5	14OCB482		26.7118	150.83	2418.25	171.745	34.208	24474.8	114.527	5.18693	1626.69	2526.17	0.0625092	bdl	6.88011	0.126152	6938.6	16.3499	12.9567	63.4003	202.635	327.144	2898.62	694.438	4349.07	1694.9	554.275	1661	204.926	1086.2	208.695	565.281	74.2697	468.965	65.1313	0.791315	0.115394	76.9481	0.0228657	144.231	212023	12061	178.972	2.17501	3.38571	604155
RX6765-right of 4-5	14OCB483		9.35698	60.1692	1408.9	124.11	25.171	25225.8	91.3167	5.52981	1349.86	2247.75	0.0270422	0.0405885	5.47971	0.598897	6818.43	16.583	13.0029	62.2587	91.3966	293.041	2803.41	690.766	4303.38	1757.17	555.751	1615.65	200.482	1059.28	203.362	557.96	74.807	478.375	62.183	0.762731	0.0200672	78.9212	bdl	145.661	225949	12923.9	197.022	2.4081	3.55281	592498
RX6765-right of 4-5	14OCB484		10.3885	74.0578	1422.12	115.892	31.957	22910.7	114.24	4.90007	1350.75	1785.37	bdl	0.0404708	5.66427	0.0746391	6757.91	16.6275	11.6396	55.3694	121.984	284.138	2696.89	661.855	4210.28	1628.46	544.7	1633.7	198.725	1058.53	204.422	567.49	70.6241	455.906	64.795	0.509654	0.0612742	74.9109	bdl	146.311	222826	13073.9	199.766	2.23528	2.87386	599128
RX6765-right of 4-5	14OCB485		111.767	481.24	3462.24	277.186	60.6817	26103.9	104.808	5.60891	1988.95	4220.97	3.01067	0.224787	3.56272	1.98977	6812.16	16.9279	14.4908	67.8638	349.431	397.917	3082.35	713.113	4302.73	1778.02	557.932	1751.67	198.294	1114.01	213.006	589.519	78.5412	476.454	67.8592	0.712102	0.0486168	86.6625	0.0445575	128.015	200873	11814.7	167.293	1.86454	3.22577	607066
RX6765-right of 4-5	14OCB486		219.559	451.634	3237.62	206.898	63.6803	23862.5	110.915	4.99934	1766.81	4208.83	5.4585	0.799009	5.10344	2.97328	6696	15.5341	14.8306	64.9936	220.061	346.217	2783.61	709.938	4106.54	1651.25	528.112	1626.92	196.842	1027.55	202.992	561.052	73.2428	460.702	64.0166	0.713835	0.130768	81.8217	0.024082	141.019	208370	12054.2	203.958	1.95507	2.86525	604432
RX6765-right of 4-5	14OCB487		28.1605	173.584	2746.38	171.775	43.8527	23576.8	107.073	5.34439	1794.98	8214.59	296.379	8.50514	4332.98	0.919999	6537.71	16.1438	13.3737	58.1176	246.989	316.208	2828.82	678.647	4207.67	1730.57	529.389	1609.34	196.158	1012.13	210.512	564.283	72.8783	468.958	63.7788	0.812166	0.0784754	77.9031	0.089942	1893.96	230799	15228.8	2662.72	4.81248	3.36421	568045
RX6765-right of 4-5	14OCB488		14.2658	152.705	2509.99	185.778	55.6641	24267.1	117.829	8.8039	1663.05	10295.5	30.7246	bdl	930.788	1.39455	6695.09	17.9693	16.531	64.9162	198.213	314.503	2830.56	693.613	4277.03	1659.32	537.969	1628.1	200.878	1084.22	209.224	562.409	74.1816	457.322	64.8509	0.796626	0.0893417	81.5816	0.0496333	149.213	219062	12823.7	209.622	2.60306	6.14144	586387
RX6765-right of 4-5	14OCB489		18.18	263.101	2437.84	91.3843	47.9077	16255	71.587	5.07455	1212.44	96579.5	888.583	15.1915	110480	8.5775	4622.28	11.7723	8.73277	48.0927	127.343	208.693	1937.13	472.556	2847.52	1096.87	365.284	1088.98	134.134	732.126	135.359	391.429	47.2759	310.079	40.9404	0.553128	0.0319952	55.113	0.440231	196.431	170662	10107.9	271.243	9.36001	3.06081	422240
RX6765-right of 4-5	14OCB490		77.6965	558.118	4341.62	275.579	76.741	23526.8	118.128	5.98313	1904.51	5402.67	4.15978	0.199863	876.713	1.2008	6968.93	16.4123	14.2802	65.7213	456.547	364.474	2910.24	722.051	4432.43	1722.37	566.626	1706.02	205.869	1101.04	210.393	568.455	79.127	495.29	63.1696	0.79518	0.105637	86.3227	bdl	138.657	203923	11776.1	187.27	2.32082	3.47715	603137
RX6765-right of 4-5	14OCB492		37.0285	299.318	4825.27	388.145	67.385	28710	131.995	7.51852	2271.2	7261.86	0.69977	bdl	5.08378	1.69125	7216.86	18.3147	14.4329	76.7371	689.583	451.041	3176.23	743.019	4454.08	1785.81	566.119	1778.94	206.837	1129.51	220.282	603.285	81.2234	489.362	65.3197	0.514045	0.0533196	94.4282	0.026041	104.179	177113	10229.5	158.395	1.63496	5.60632	620117
RX6765-right of 4-5	14OCB493		43.097	307.924	4229.77	311.864	55.6576	26122.8	114.208	10.2281	2363.44	8483.41	0.334762	0.366516	4.07954	1.29466	6585.63	19.2749	16.1465	72.2874	308.28	385.155	3039.02	715.224	4214.92	1661.21	554.019	1598.63	206.411	1056.67	212.04	574.02	73.5117	463.846	65.0303	0.536289	0.079237	89.9882	0.0255744	131.446	188832	10788.7	157.401	2.0206	4.43964	613315
RX6765-right of 4-5	14OCB494		378.483	2070.36	10595.4	327.497	212.712	25456	132.096	10.3704	2682.4	16021.6	3.72065	bdl	4.55682	3.53198	6826.25	17.6158	17.869	84.7865	684.189	422.986	3126.31	715.743	4606.99	1725.9	581.117	1762.52	200.825	1069.94	212.251	583.363	74.3884	491.302	67.2224	0.569805	0.139141	99.8662	0.0346039	199.103	152025	8985.51	286.054	1.58297	4.02408	623592
RX6765-right of 4-5	14OCB495		41.0929	329.699	2514.44	140.184	183.302	21110.5	111.377	7.10266	1650.31	28380.1	329.434	3.91159	27207.6	5.8228	6214.63	15.193	13.3167	65.8419	224.926	286.79	2740.73	629.447	3884.88	1501.17	497.078	1554.18	178.205	956.541	182.842	509.799	68.1958	413.294	57.0728	0.579396	0.119372	78.917	0.185586	642.374	211183	12827.9	977.063	5.31792	3.45755	545758
RX6765-right of 4-5	14OCB496		82.62	267.968	2908.9	131.138	35.0136	20916.6	110.64	5.89227	1728.69	4273.46	5.4028	bdl	214.698	2.98313	6582.36	16.0613	13.4076	63.0201	172.377	302.352	2724.6	654.427	4182.58	1648.17	532.404	1605.63	192.333	1087.02	203.078	559.194	71.8128	441.995	66.3449	0.723085	0.0662097	79.5369	bdl	181.062	221741	12916.8	222.621	2.84992	3.82601	595780
RX6765-right of 4-5	14OCB497		23.1193	205.809	2720.62	206.068	74.878	23019.5	116.186	6.45416	1728.16	3868.95	2.4823	bdl	454.692	2.34431	6743.86	17.6379	12.694	64.9966	263.571	331.906	2856.84	682.225	4316.06	1676.6	562.276	1655.28	201.897	1092.79	211.992	576.892	75.9958	473.723	64.3812	0.475883	0.00548233	89.1253	bdl	175.574	215416	12566.4	221.531	2.24144	3.16198	599317
RX6765-right of 4-5	14OCB498		17.7065	130.63	2023.61	99.3565	35.3739	25016	96.8275	5.20703	1604.78	2607.1	0.184999	0.354986	6.95178	0.980953	6952.85	15.4477	13.5161	65.3399	171.974	316.043	2971.92	703.569	4480.74	1811.95	580.801	1759.17	201.765	1141.43	214.744	585.035	78.4132	471.732	67.7915	0.61975	0.0602834	83.9456	bdl	209.046	225129	13287.8	282.433	2.48745	3.10383	590053
RX6765-right of 4-5	14OCB499		857.789	2425.16	6253.06	172.247	49.0696	24419.5	119.028	7.40907	1782.16	12023.5	42.9816	5.6016	817.978	12.5979	6606.55	15.3258	12.8221	64.0204	254.525	330.516	2849.21	684.621	4112.29	1714.27	556.725	1622.13	198.069	1057.47	196.579	544.34	73.9714	456.82	63.4112	0.349594	0.145858	82.3745	0.0307263	137.298	209269	12161.6	195.094	2.82912	2.99498	582084
RX6765-right of 4-5	14OCB500		41.312	550.548	3776.08	249.634	58.8743	24503.5	167.189	15.5499	1906.2	39890.6	49.6542	1.10317	1985.44	3.65758	6863.57	19.8546	33.5347	68.4519	285.101	371.886	2859.19	715.729	4337.06	1693.69	552.868	1660.88	191.896	1091.16	209.159	588.252	79.7433	467.353	67.28	0.80291	0.343309	83.0761	0.0191802	1009.39	184734	11346.2	1398.15	3.36403	5.46139	575489
RX6765-right of 4-5	14OCB501		128.075	883.715	4810.32	401.689	73.9734	31406.4	143.906	12.9235	2292.18	14226.7	0.382015	bdl	3.55554	1.27076	8073.48	21.336	17.6286	68.671	636.144	457.673	3422.64	803.033	5084.87	2042.8	632.868	1934.4	241.357	1285.81	253.791	668.056	88.3527	533.243	73.0107	1.16169	0.0876419	86.5222	bdl	307.191	159700	9319.78	428.574	1.40112	4.69069	621093
RX6765-right of 4-5	14OCB502		29.1288	225.787	2745.3	155.129	117.376	23518.7	104.502	5.88483	1678.3	4367.34	14.6014	0.792998	1008.87	1.34202	6618.43	18.7878	12.5563	63.7889	220.632	311.584	2841.34	688.089	4130.34	1633.52	524.264	1604.75	191.774	1050.56	199.266	542.25	75.1145	459.299	67.3223	0.737756	0.0277878	80.5538	bdl	145.21	213256	12379.5	197.955	2.58816	4.24214	600434
RX6765-right of 4-5	14OCB503		83.7939	607.112	4149.93	264.41	66.326	27449.8	126.027	7.78032	2132.52	6181.53	0.483136	0.20157	4.44408	1.3748	7045.08	17.7633	14.6309	72.6755	394.244	391.286	3080.84	721.708	4500.62	1771.24	581.711	1681.6	208.49	1143.6	211.727	600.592	76.3056	472.613	66.9696	0.709262	0.0774309	90.7877	0.011131	125.793	193772	11266.3	167.863	1.97403	5.56413	608050
RX6765-right of 4-5	14OCB504		26.8859	168.865	2188.25	144.374	79.2191	24429.2	100.753	5.11858	1632.31	3981.44	138.559	0.500597	1125.6	1.98338	6853.12	17.4941	13.6657	55.6301	180.866	333.454	2814.62	704.14	4295.27	1799.89	561.823	1745.89	214.235	1118.06	212.75	592.505	79.0849	495.673	67.4063	0.754891	0.113313	76.4901	0.00789948	201.102	210046	12096.9	276.622	2.79523	4.19659	603053
RX6765-right of 4-5	14OCB505		9.3874	50.4462	1302.83	78.4611	30.2455	23552.4	88.0781	5.13114	1259.43	1541.15	0.902443	0.417586	50.9291	0.597466	6844.89	19.0724	13.1252	58.2027	94.7516	282.903	2695.79	712.451	4395.26	1737.57	556.233	1689.99	198.005	1103.15	215.104	583.338	77.0875	465.807	67.0248	0.692127	0.0827511	77.6832	0.030744	145.961	221558	13077.8	202.317	2.63552	4.70577	599682
RX6765-right of 4-5	14OCB506		134.574	292.418	2732.28	204.564	42.1656	22108.2	95.2764	4.84516	1556.31	39795	1604.77	35.2099	31987.2	5.40499	6252.32	16.5214	11.6982	52.6746	146.958	281.542	2597.91	639.557	3970.68	1615.86	508.845	1601	181.609	981.287	197.04	539.089	71.5342	456.375	59.8716	0.648588	0.0606859	67.9531	0.165496	611.415	195283	12201.4	819.703	11.2635	3.78623	538771
RX6765-right of 4-5	14OCB507		32.3082	226.049	2302.21	78.6761	127.352	24495.6	97.6636	5.40327	1434.23	2227.68	0.177513	bdl	3.90473	0.785928	6813.54	18.1811	13.0478	59.7402	153.658	287.513	2791.03	718.46	4466.16	1786.02	567.468	1677.44	207.268	1087.98	207.176	577.655	73.745	462.266	65.2382	0.911041	0.0764177	85.6781	0.0185773	132.937	233388	13313.5	201.66	2.46163	4.05179	583491
RX6765-right of 4-5	14OCB508		12.0526	88.3362	1413.96	120.265	35.1775	25078.8	95.6721	4.862	1432.62	1813.27	0.0621435	0.143893	3.5557	1.74062	6968.17	18.4464	13.1516	62.2303	140.356	294.617	2816.78	720.885	4497.44	1762.54	573.576	1768.26	204.321	1100.69	209.136	613.83	74.8659	481.496	65.9504	0.905614	0.0710489	78.8941	bdl	142.596	221500	13196.7	198.543	2.32361	3.837	596275
RX6765-right of 4-5	14OCB509		792.959	1470.42	4402.35	135.649	60.2107	7646.34	45.9141	3.05901	825.376	249518	8579.87	257.444	168103	24.554	2364.34	6.06486	4.33087	24.2381	62.1487	134.976	1033.5	245.82	1464.88	648.066	197.554	569.953	73.4141	398.231	76.3472	222.822	27.2273	169.872	24.0101	0.384153	0.0686851	26.7028	1.12988	5205.37	134705	13866.2	7644.48	35.1259	1.04303	187289
all results obtained with laser-ablation ICP-MS, using U ppm determined by SEM-EDS and internal, and NIST610 glass as external standard (see Supplementary Material)
McDonough and Sun 1995: C1 values in ppm

## Sheet: G48930
Ehrig, K., et al., 2021, Staged formation of the supergiant Olympic Dam uranium deposit, Australia: Geology, v. 49, https://doi.org/10.1130/G48930.1
